# Supplementary material for: Aggregation induced emission and reversible mechanofluorochromism active carbazole–anthracene conjugated cyanostilbenes with different terminal substitutions
Source: Royal Society of Chemistry journal article supplement (doi:10.1039/d3nj03057a), 2023-01-01
Supplement: d3nj03057a1.pdf [file d3nj03057a1.pdf]

# Aggregation Induced Emission and Reversible Mechanofluorochromism Active Carbazole-Anthracene Conjugated Cyanostilbenes with Different Terminal Substitutions

Afrin A<sup>a</sup> and Chinna Ayya Swamy P<sup>a\*</sup>

<sup>a</sup>Main group Organometallics Optoelectronic Materials and Catalysis lab, Department of Chemistry, National Institute of Technology, Calicut, India-673601.

Corresponding author: [swamy@nitc.ac.in](mailto:swamy@nitc.ac.in)

| <b>Table of contents for supporting information</b>                                                                          | <b>Page number</b> |
|------------------------------------------------------------------------------------------------------------------------------|--------------------|
| 1. Methods and Materials                                                                                                     | S2-S6              |
| 2. <sup>1</sup> H and <sup>13</sup> C Nuclear Magnetic Resonance (NMR) and High-Resolution Mass Spectroscopic (HRMS) studies | S7-S12             |
| 3. Photophysical Properties                                                                                                  | S13-S16            |
| 4. TGA and DSC                                                                                                               | S17-S18            |
| 5. AFM, DLS and SEM                                                                                                          | S19-S21            |
| 6. FTIR data                                                                                                                 | S22                |
| 7. Density Functional Theory results                                                                                         | S22-S28            |

## 1. Experimental Section

### 1.1 Materials and measurements

The chemicals and solvents including 9H-carbazole, 1-bromohexane, N-bromosuccinimide (NBS), bis(pinacolato)diboron, triphenylphosphine, dichlorobis(triphenylphosphine)palladium(II), tetrakis (triphenylphosphine) palladium(0), benzyl cyanide, 4-chlorophenylacetonitrile, 4-methoxyphenylacetonitrile, potassium acetate (KOAc), NaOH, K<sub>2</sub>CO<sub>3</sub>, dimethylformamide, chloroform, tetrahydrofuran (THF) and methanol(MeOH) were purchased from a commercial supplier and used as received. Toluene was dried over sodium and freshly distilled and use. The <sup>1</sup>H and <sup>13</sup>C NMR spectra of the synthesized compounds were recorded on a JEOL JNM-ECZ-500R/M1 (500 MHz) NMR instrument using CDCl<sub>3</sub> as the solvent, and tetramethylsilane (TMS) as an internal standard. The high resolution mass spectrometry (HRMS) was carried out with a data were obtained from a Thermo Scientific Exactive mass spectrometer with Orbitrap analyser and the ions are given in m/z. The UV–vis absorption spectra was measured using a LAMBDA 365 UV/Vis Spectrophotometer with keeping slit width 1. Fluorescent measurements were carried out on perkinelmer LS-55 fluorescence spectrometer. The solid-state measurements were measured on Horiba fluorescence spectrophotometer. The XRD pattern in the 2θ range from 0° to 90° was recorded using a PANalytical X'Pert3 powder X-ray diffractometer, with a CuKα source of 1.5406 Å at a scan rate of 1° min<sup>-1</sup>. SEM images were obtained using Hitachi SU6600 variable pressure. Atomic force microscopic (AFM) images of samples drop casted on glass slide were obtained by XE-100 (Park Systems). Dynamic light scattering (DLS) measurements of aggregates were performed on the STABINO ZETA. Density functional theory (DFT) calculations were made on B3LYP/6-31G(d) level using the Gaussian 09W program package. TGA measurements were conducted on TGA Q50 V20.13 Build 39 instrument. The DSC curves were obtained using DSC Q20 V24.11 Build 124 model instrument. Quantum yields (ff) of fluorescence were obtained using quinine sulfate (0.545 in 1 N H<sub>2</sub>SO<sub>4</sub>) as a reference standard.

### 1.2 Synthesis of target compounds

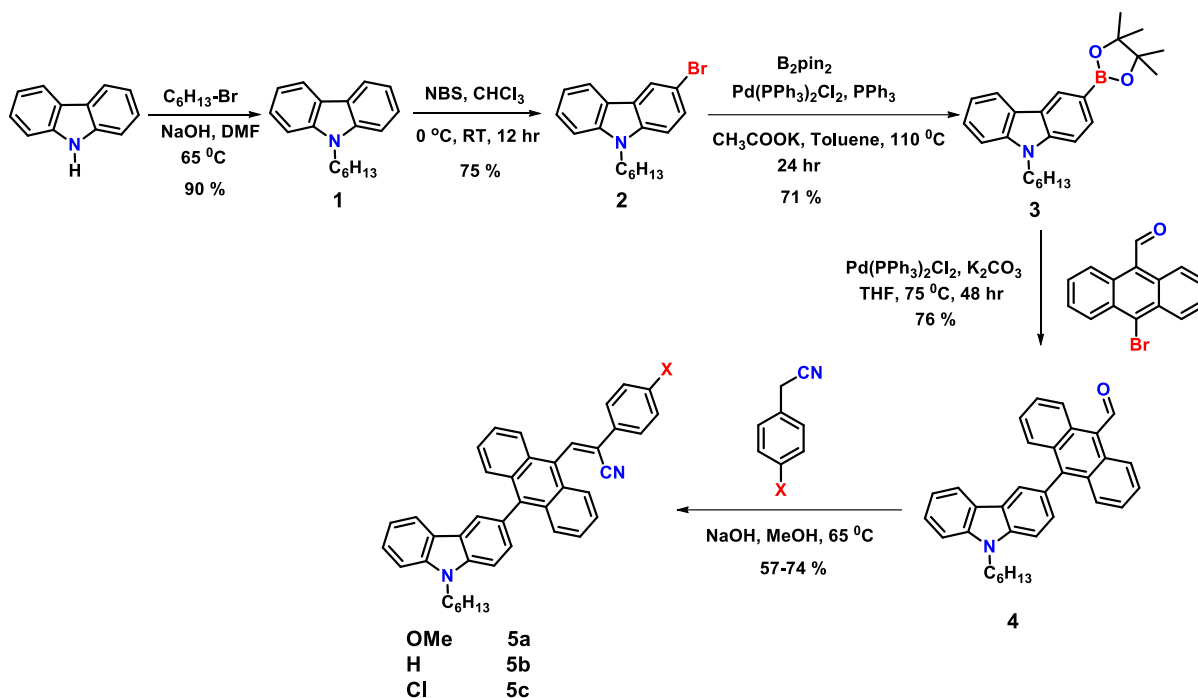

### Synthesis of 9-hexyl-9H-carbazole (**1**)

To a solution of carbazole (20 g, 119.6 mmol) dissolved in DMF (80 mL), NaOH (19.1 g, 478.4 mmol) and 1-bromohexane (25 mL, 179.4 mmol) was added. The reaction mixture was stirred at 70°C for 4 h. The reaction was monitored via thin layer chromatography (TLC) and confirmed the formation of product. After cooling the reaction to room temperature, it was quenched with water and the crude product was extracted with ethyl acetate and brine solution for 5-6 times. The organic fraction was dried over anhydrous Na<sub>2</sub>SO<sub>4</sub> and concentrated under reduced pressure. The crude product was then purified by silica gel column chromatography with hexane/ethylacetate as the eluents. The pure product was obtained as a white solid (27.2 g, 90 %). The NMR data was matches with the literature reported values. <sup>1</sup>H NMR (500 MHz; CDCl<sub>3</sub>): δ ppm 8.13 – 8.09 (m, 2H), 7.49 – 7.45 (m, 2H), 7.43 – 7.40 (m, 2H), 7.25 – 7.21 (m, 2H), 4.30 (t, *J* = 7.3 Hz, 2H), 1.88 (dt, *J* = 19.0, 7.5 Hz, 2H), 1.45 – 1.38 (m, 2H), 1.35 – 1.26 (m, 4H), 0.90 – 0.84 (m, 3H).

### Synthesis of 3-bromo-9-hexyl-9H-carbazole (**2**)

To a suspension of n-hexyl carbazole (5 g, 19.9 mmol) in CHCl<sub>3</sub> (100 ml) N-bromosuccinimide (3.5 g, 19.9 mmol) was added portion wise at 0 °C within 30 minutes. The reaction mixture was slowly warmed to room temperature and stirred for further 12 h. The reaction was quenched with water and the product was extracted with CHCl<sub>3</sub>. The organic layer was

collected and dried over  $\text{Na}_2\text{SO}_4$ . The crude product was then purified by flash column chromatography with hexane-ethyl acetate as the eluents. The Solvents were evaporated to yield a sticky white solid (4.97 g, 75 %). The NMR data was matches with the literature reported values.  $^1\text{H}$  NMR (500 MHz;  $\text{CDCl}_3$ ):  $\delta$  ppm 8.20 (d,  $J = 1.9$  Hz, 1H), 8.04 (d,  $J = 8.7$  Hz, 1H), 7.53 (dd,  $J = 8.7, 2.0$  Hz, 1H), 7.49 – 7.46 (m, 1H), 7.40 (d,  $J = 8.3$  Hz, 1H), 7.28 (d,  $J = 8.5$  Hz, 1H), 7.24 (s, 1H), 4.27 (t,  $J = 7.3$  Hz, 2H), 1.84 (dt,  $J = 15.0, 7.5$  Hz, 2H), 1.29 (dd,  $J = 6.4, 3.2$  Hz, 6H), 0.86 (t,  $J = 7.1$  Hz, 3H).

#### Synthesis of 9-hexyl-3-(4,4,5,5-tetramethyl-1,3,2-dioxaborolan-2-yl)-9H-carbazole (**3**)

To 100 ml oven dried Schlenk flask cooled under vacuum, 3-bromo-9-hexyl-9H-carbazole (2 g, 6.1 mmol), bis(pinacol-ato)diboron (1.9 g, 7.6 mmol), potassium acetate (1.8 g, 18.2 mmol), triphenylphosphine (63.3 mg, 0.25 mmol) were added and dissolved using dry toluene (50 ml) under nitrogen atmosphere. And the reaction mixture is degassed using  $\text{N}_2$  gas for 30 minutes. After that dichlorobis(triphenylphosphine)palladium(II) (64 mg, 0.12 mmol) catalyst were added and purged using  $\text{N}_2$  gas and the reaction was refluxed at 110 °C for 24 h. The solvent was evaporated under reduced pressure, crude product was extracted with ethylacetate, and the organic volume were dried over sodium sulfate. The crude product was obtained as a brown–black liquid upon removal of solvents under vacuo. The product was purified by column chromatography using hexane/ethylacetate as eluents. The solvents were evaporated to obtain as colorless oil (1.63 g, 71 %). The NMR data was matches with the literature reported values.  $^1\text{H}$  NMR (500 MHz,  $\text{CDCl}_3$ ):  $\delta$  ppm 8.66 (s, 1H), 8.18 (d,  $J = 8.2$  Hz, 1H), 7.97 (d,  $J = 10.2$  Hz, 1H), 7.50 (t,  $J = 7.1$  Hz, 2H), 7.43 (d,  $J = 8.2$  Hz, 2H), 4.32 (t,  $J = 7.3$  Hz, 2H), 1.95 – 1.85 (m, 2H), 1.44 (s, 12H), 1.35 – 1.27 (m, 6H), 0.90 (t,  $J = 7.0$  Hz, 3H).

#### Synthesis of 10-(9-hexyl-9H-carbazol-3-yl)anthracene-9-carbaldehyde (**4**)

To a 100 ml Schlenk flask (9-Hexylcarbazol-3-yl) boronic acid pinacol ester (0.7 g, 2.1 mmol), 10-bromoanthracene-9-carbaldehyde (0.55 g, 1.9 mmol) and potassium carbonate (2 M, 10 mL) were dissolved in tetrahydrofuran (50 mL). The reaction mixture was degassed using  $\text{N}_2$  gas for 30 minutes then tetrakis (triphenylphosphine) palladium (0)  $\text{Pd}(\text{PPh}_3)_4$  (44.5 mg, 0.03 mmol) catalyst was added to the reaction mixture. The reaction mixture was refluxed for 24 h under  $\text{N}_2$  atmosphere. After removing the volatiles, the crude product was extracted using ethylacetate/water and brine solution. The organic layer collected were dried over sodium sulfate. The crude product obtained as yellow powder upon concentrating under reduced

pressured was purified using column chromatography with hexane/EtOAc as eluents. The pure product is obtained as fine yellow powder (640 mg, 76 %). <sup>1</sup>HNMR (500 MHz, CDCl<sub>3</sub>): δ ppm 11.63 (s, 1H), 9.07 (d, *J* = 9.0 Hz, 2H), 8.14 (d, *J* = 1.3 Hz, 1H), 8.06 (d, *J* = 7.8 Hz, 1H), 7.84 (d, *J* = 8.8 Hz, 2H), 7.69 – 7.65 (m, 2H), 7.62 (d, *J* = 8.3 Hz, 1H), 7.54 – 7.52 (m, 2H), 7.48 (d, *J* = 6.6 Hz, 1H), 7.40 (d, *J* = 6.5 Hz, 1H), 7.38 (d, *J* = 5.5 Hz, 1H), 7.25 (d, *J* = 6.1 Hz, 1H), 4.43 (t, *J* = 7.3 Hz, 2H), 2.04 – 1.99 (m, 2H), 1.55 – 1.50 (m, 2H), 1.39 (dd, *J* = 12.7, 5.8 Hz, 4H), 0.93 (d, *J* = 7.1 Hz, 3H). <sup>13</sup>CNMR (126 MHz, CDCl<sub>3</sub>) δ ppm 193.84, 147.40, 141.44, 140.52, 132.35, 131.14, 129.07, 128.72, 128.67, 126.61, 125.80, 125.18, 123.88, 123.31, 123.06, 122.96, 120.99, 119.63, 109.44, 109.04, 107.44, 43.85, 32.10, 29.55, 27.55, 23.07, 14.52. HRMS-ESI Calcd. for C<sub>33</sub>H<sub>29</sub>NO Exact Mass: 456.2327; Found 456.2326 (M+H)<sup>+</sup>.

#### (Z)-3-(10-(9-hexyl-9H-carbazol-3-yl)anthracen-9-yl)-2-(4-methoxyphenyl)acrylonitrile (**5a**)

To a suspension of 10-(9-hexyl-9H-carbazol-3-yl)anthracene-9-carbaldehyde (300 mg, 0.65 mmol) in 50 ml methanol, sodium hydroxide (55 mg, 1.3 mmol) and 4-methoxy phenyl acetonitrile (144 μL, 0.98 mmol) were added. The reaction mixture was stirred at 65 °C for 6 h. The reaction was monitored via thin layer chromatography (TLC) and the formation of product was confirmed. After cooling the reaction to room temperature, the mixture was filtered and washed with methanol. The pure product was obtained as yellow powder (220 mg, 57 %). <sup>1</sup>HNMR (500 MHz, CDCl<sub>3</sub>) δ ppm 8.40 (s, 1H), 8.21 – 8.06 (m, 4H), 7.89 (d, *J* = 8.8 Hz, 2H), 7.82 (d, *J* = 8.8 Hz, 2H), 7.63 (d, *J* = 8.2 Hz, 1H), 7.53 (dd, *J* = 15.8, 8.1 Hz, 5H), 7.38 – 7.34 (m, 2H), 7.24 (d, *J* = 7.9 Hz, 1H), 7.09 (d, *J* = 8.7 Hz, 2H), 4.44 (t, *J* = 7.3 Hz, 2H), 3.93 (s, 3H), 2.05 – 1.98 (m, 2H), 1.52 (dd, *J* = 15.3, 7.6 Hz, 2H), 1.40 (ddd, *J* = 22.0, 12.0, 5.5 Hz, 4H), 0.93 (t, *J* = 7.1 Hz, 3H). <sup>13</sup>CNMR (126 MHz, CDCl<sub>3</sub>) δ ppm 161.40, 141.41, 140.83, 140.41, 138.71, 131.19, 129.78, 129.27, 129.17, 128.76, 128.32, 128.03, 126.64, 126.44, 126.41, 125.66, 125.61, 123.55, 123.35, 123.14, 121.21, 121.02, 119.50, 117.35, 115.12, 109.35, 108.99, 56.04, 43.86, 32.13, 29.58, 27.59, 23.10, 14.54. HRMS-ESI Calcd. for C<sub>42</sub>H<sub>37</sub>N<sub>2</sub>O Exact Mass: 585.2905; Found 585.2911 (M+H)<sup>+</sup>. FTIR (pallet made with KBr) (cm<sup>-1</sup>) 3056, 2955, 2925, 2848, 2224, 1605, 1512, 1461, 1377, 1339, 1238, 1183, 1018, 832, 807, 778, 739, 659. M. P. 260-264 °C (decomposes).

#### Synthesis of (Z)-3-(10-(9-hexyl-9H-carbazol-3-yl)anthracen-9-yl)-2-phenylacrylonitrile (**5b**)

The synthesis of **5b** was similar procedure of **5a** and data as follows: 10-(9-hexyl-9H-carbazol-3-yl)anthracene-9-carbaldehyde (300 mg, 0.65 mmol), benzyl cyanide (200 μL, 0.98 mmol),

sodium hydroxide (55 mg, 1.3 mmol) and 50 mL methanol. The pure product was obtained as yellow powder (270 mg, 74 %). <sup>1</sup>H NMR (500 MHz, CDCl<sub>3</sub>) δ ppm 8.56 (s, 1H), 8.21 – 8.12 (m, 3H), 8.08 (d, *J* = 7.6 Hz, 1H), 7.96 (d, *J* = 7.3 Hz, 2H), 7.83 (d, *J* = 8.8 Hz, 2H), 7.63 (d, *J* = 8.3 Hz, 1H), 7.59 (t, *J* = 7.4 Hz, 2H), 7.56 – 7.50 (m, 6H), 7.40 – 7.34 (m, 2H), 7.24 (d, *J* = 5.8 Hz, 1H), 4.44 (t, *J* = 7.3 Hz, 2H), 2.06 – 1.96 (m, 2H), 1.52 (d, *J* = 7.8 Hz, 2H), 1.44 – 1.34 (m, 4H), 0.93 (t, *J* = 7.1 Hz, 3H). <sup>13</sup>C NMR (126 MHz, CDCl<sub>3</sub>) δ ppm 141.41, 141.19, 141.08, 140.41, 133.83, 131.17, 130.29, 129.78, 129.68, 129.23, 129.10, 128.80, 128.00, 126.76, 126.64, 126.43, 125.69, 125.49, 123.53, 123.36, 123.12, 121.76, 121.01, 119.51, 117.17, 109.36, 109.01, 43.85, 32.12, 29.57, 27.57, 23.09, 14.54. HRMS-ESI Calcd. for C<sub>41</sub>H<sub>35</sub>N<sub>2</sub> Exact Mass: 555.2800; Found 585.2796 (M+H)<sup>+</sup>. FTIR (pallet made with KBr) (cm<sup>-1</sup>) 3046, 2963, 2925, 2857, 2226, 1597, 1465, 1386, 1326, 1271, 1233, 1136, 803, 748, 685, 656, 605. M. P. 252-256 °C (decomposes).

Synthesis of (Z)-2-(4-chlorophenyl)-3-(10-(9-hexyl-9H-carbazol-3-yl)anthracen-9-yl)acrylonitrile (**5c**)

The synthesis of **5c** was similar procedure of **5a** and data as follows: 10-(9-hexyl-9H-carbazol-3-yl)anthracene-9-carbaldehyde (300 mg, 0.65 mmol), 4-chlorophenylacetonitrile (150 μL, 0.98 mmol), sodium hydroxide (55 mg, 1.3 mmol) and 50 mL methanol. The pure product was obtained as yellow powder (250 mg, 64 %). Follows the same procedure of **1** in the place of 4-methoxyphenylacetonitrile, is used. <sup>1</sup>H NMR (500 MHz, CDCl<sub>3</sub>) δ ppm 8.53 (s, 1H), 8.24 – 8.01 (m, 4H), 7.88 (d, *J* = 8.5 Hz, 2H), 7.85 (d, *J* = 8.8 Hz, 2H), 7.64 (d, *J* = 8.3 Hz, 1H), 7.56 (d, *J* = 8.5 Hz, 4H), 7.52 (d, *J* = 1.0 Hz, 2H), 7.40 – 7.35 (m, 2H), 7.25 (d, *J* = 8.0 Hz, 2H), 4.44 (t, *J* = 7.3 Hz, 2H), 2.09 – 1.97 (m, 2H), 1.56 – 1.49 (m, 2H), 1.47 – 1.33 (m, 4H), 0.94 (t, *J* = 7.1 Hz, 3H). <sup>13</sup>C NMR (126 MHz, CDCl<sub>3</sub>) δ ppm 141.65, 141.42, 141.36, 140.44, 136.39, 132.34, 131.16, 130.02, 130.00, 129.65, 129.20, 129.01, 128.88, 127.90, 127.59, 126.89, 126.46, 125.73, 125.34, 123.51, 123.36, 123.11, 121.01, 120.64, 119.53, 116.88, 109.38, 109.02, 77.76, 77.50, 77.25, 43.87, 32.13, 29.58, 27.58, 23.10, 14.54. HRMS-ESI Calcd. for C<sub>41</sub>H<sub>34</sub>ClN<sub>2</sub> Exact Mass: 589.2410; Found 589.2428 (M+H)<sup>+</sup>. FTIR (pallet made with KBr) (cm<sup>-1</sup>) 3056, 2955, 2921, 2845, 2229, 1596, 1491, 1381, 1330, 1271, 1229, 1149, 1094, 1014, 807, 739, 651, 621. M. P. 245-248 °C (decomposes).

## 1.2 Characterisation data

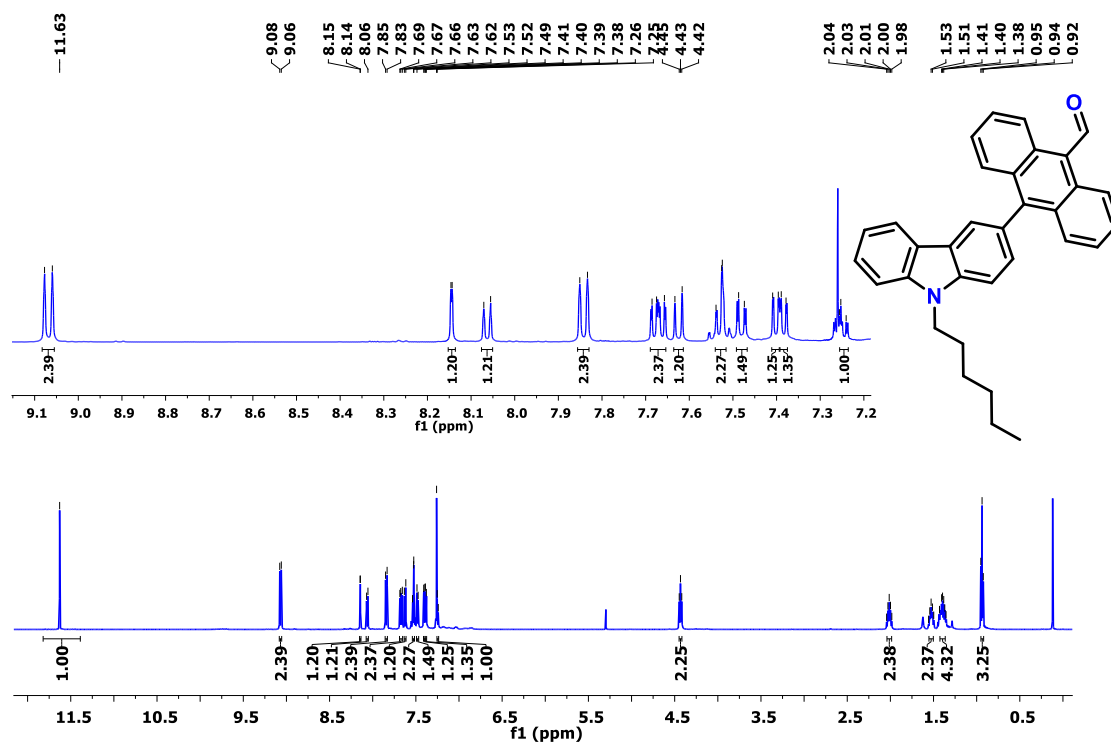

Figure S1:  $^1\text{H}$  NMR spectrum of **4** ( $\text{CDCl}_3$ , 500 MHz, RT)

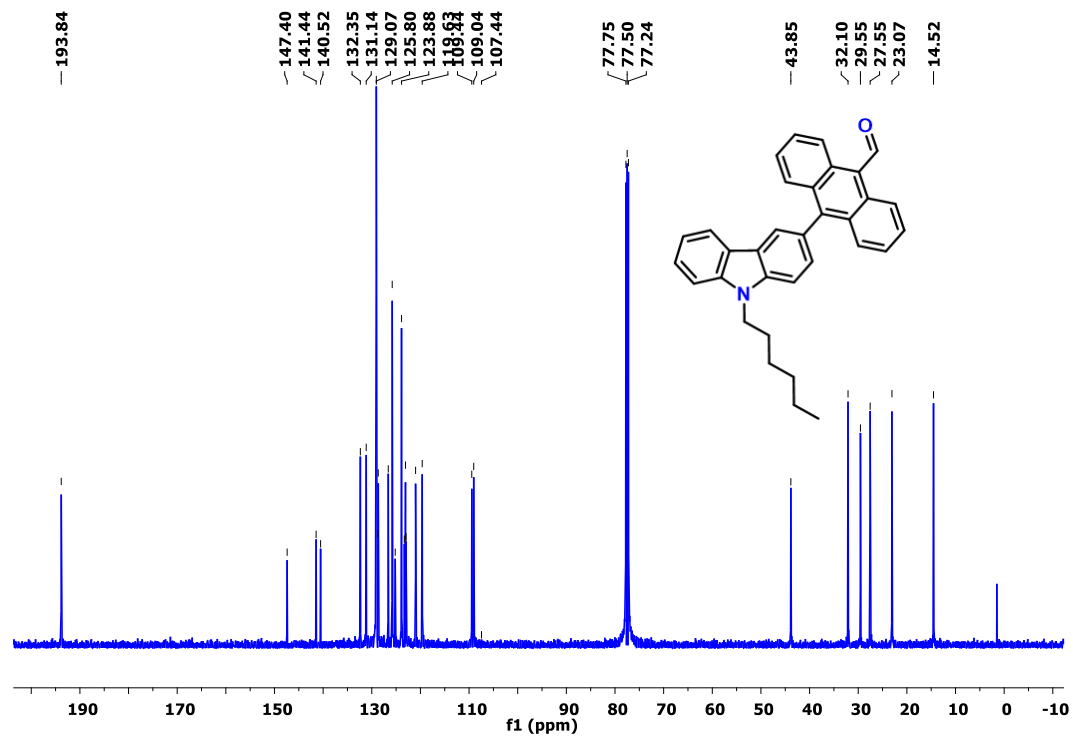

Figure S2:  $^{13}\text{C}$  NMR spectrum of **4** ( $\text{CDCl}_3$ , 125 MHz, RT)

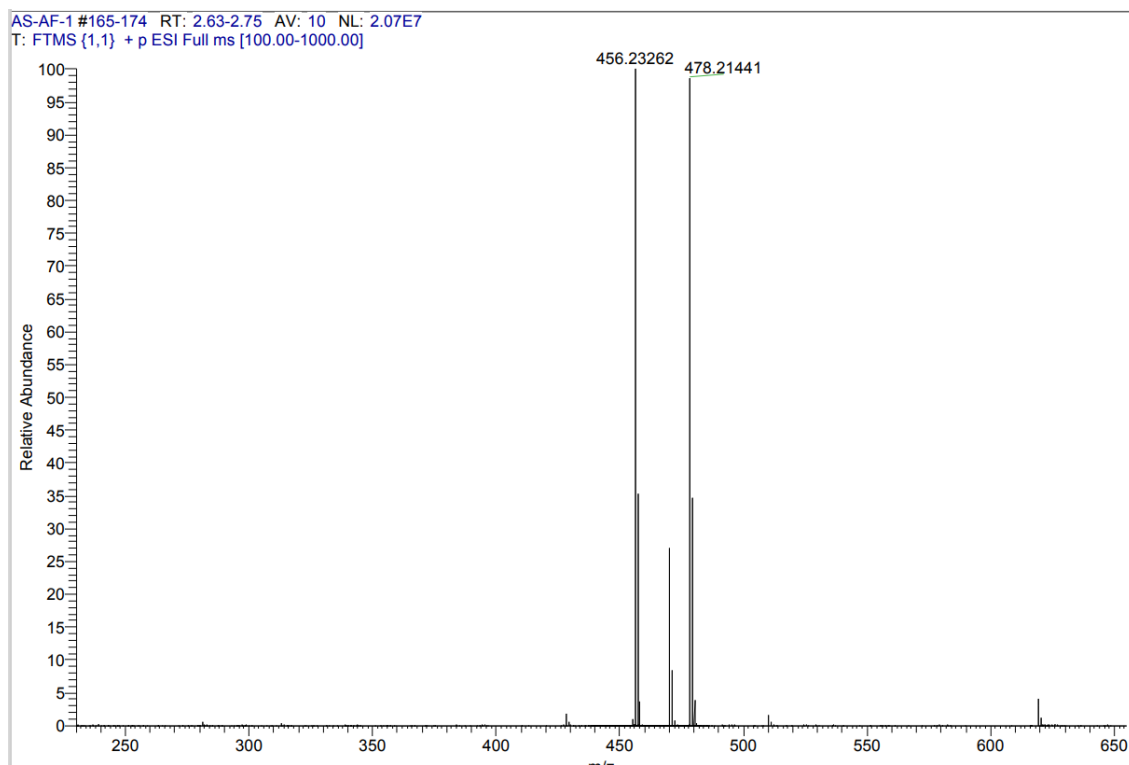

Figure S3: HRMS-ESI spectrum of **4**

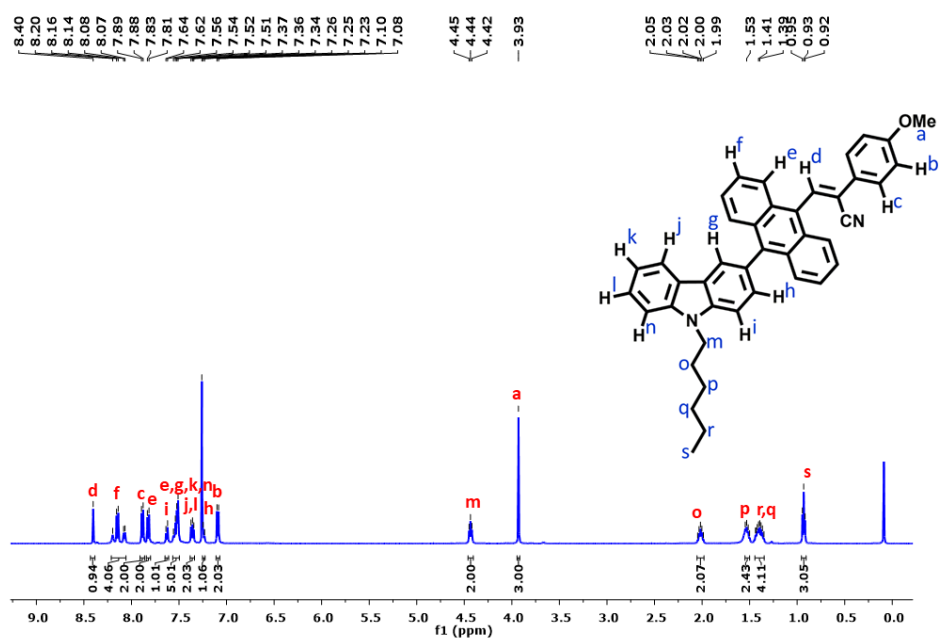

Figure S4: <sup>1</sup>H NMR spectrum of **5a** (CDCl<sub>3</sub>, 500 MHz, RT)



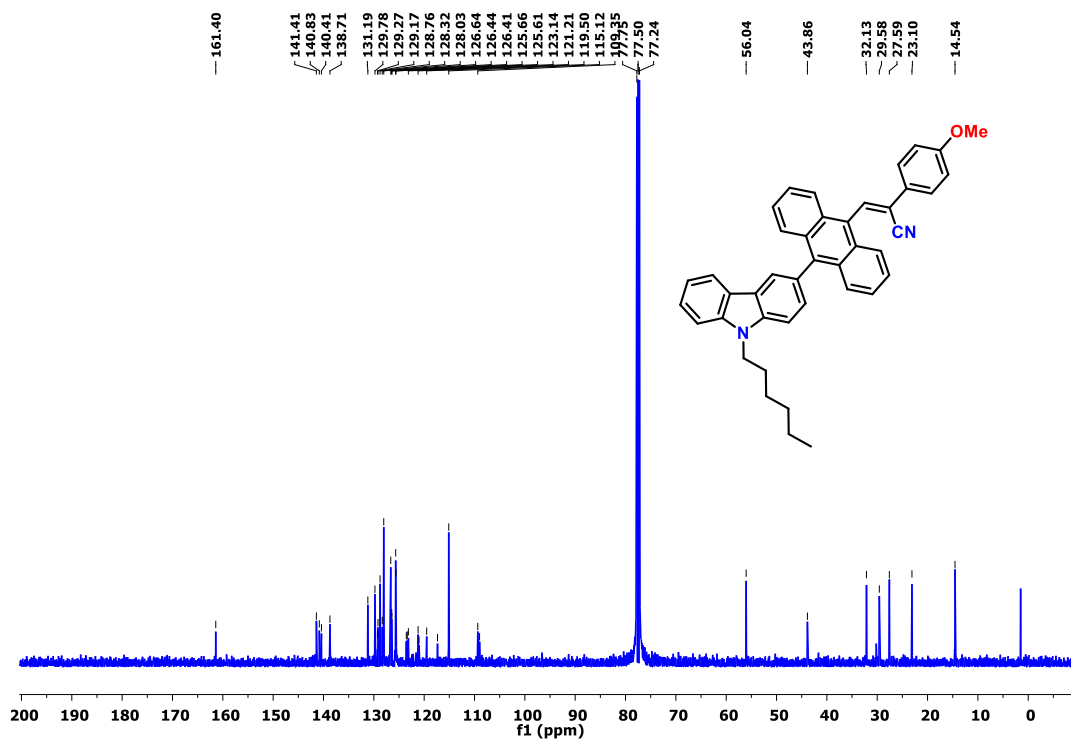

**Figure S5:** <sup>13</sup>C NMR spectrum of **5a** (CDCl<sub>3</sub>, 125 MHz, RT)

AS-AF-2 #128 RT: 2.11 AV: 1 NL: 7.09E6  
T: FTMS (1,1) + p ESI Full lock ms [100.00-1000.00]

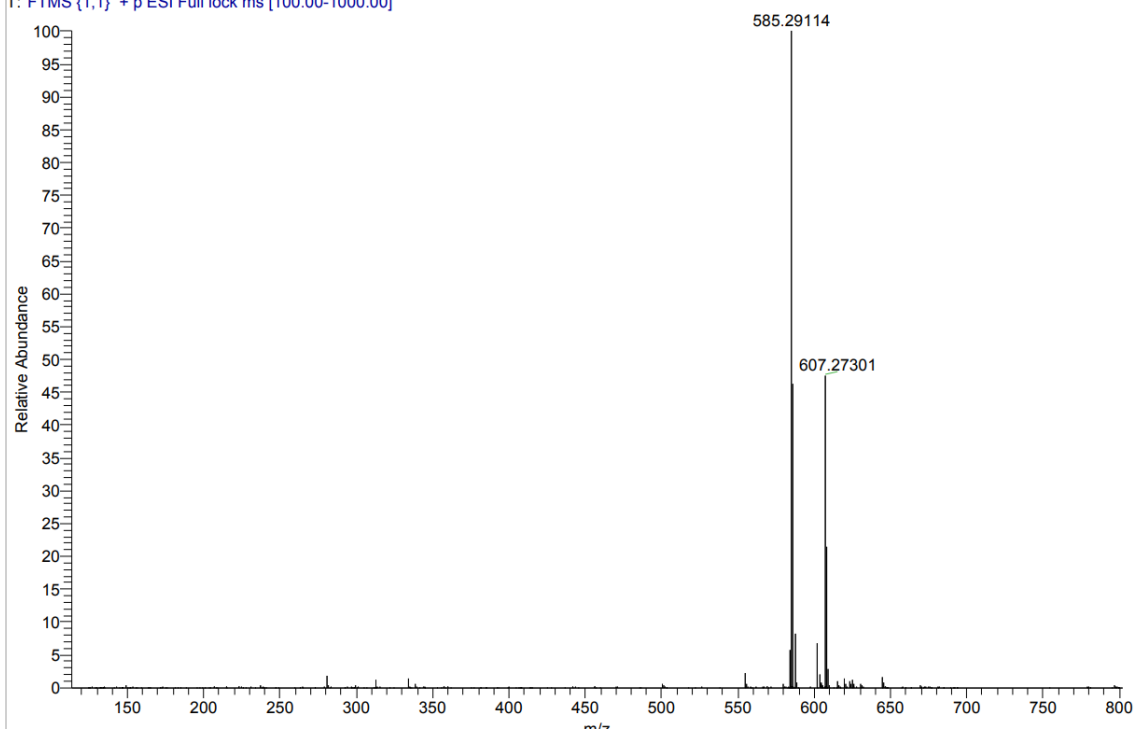

**Figure S6:** HRMS-ESI spectrum of **5a**

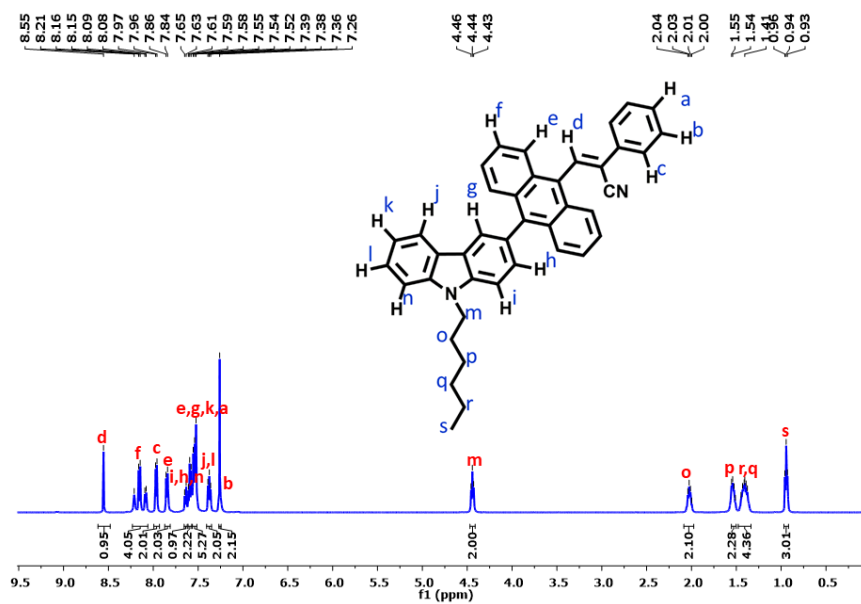

Figure S7:  $^1\text{H}$  NMR spectrum of **5b** ( $\text{CDCl}_3$ , 500 MHz, RT)

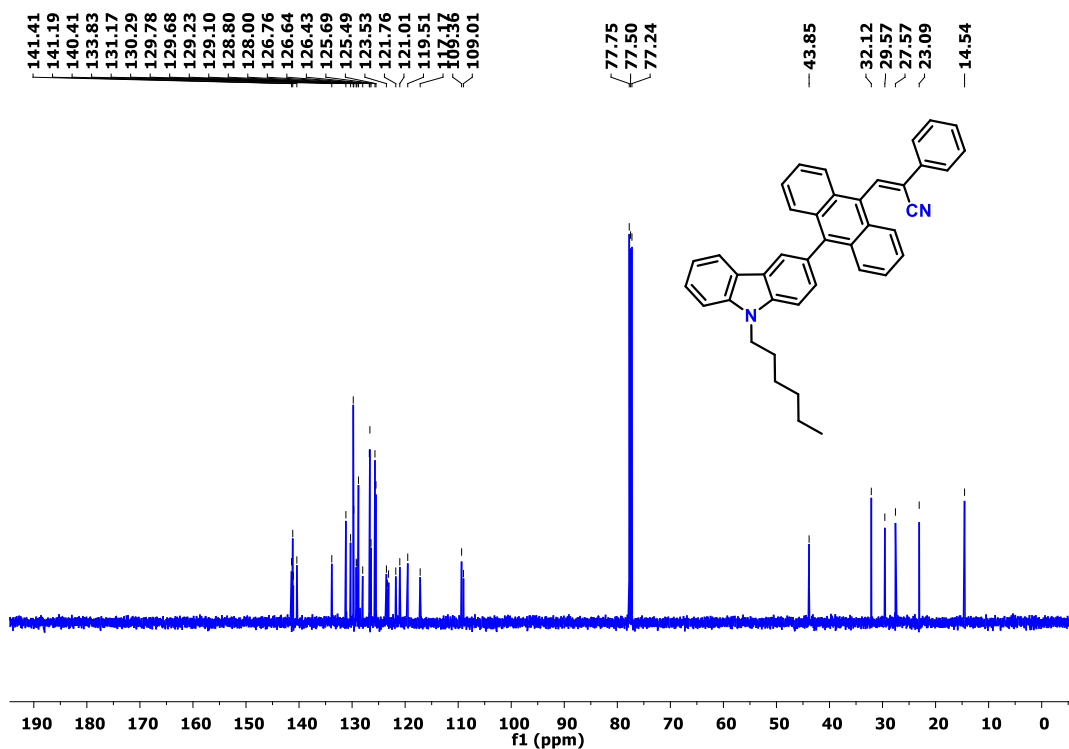

Figure S8:  $^{13}\text{C}$  NMR spectrum of **5b** ( $\text{CDCl}_3$ , 125 MHz, RT)

AS-AF-4 #145 RT: 2.36 AV: 1 NL: 9.44E6  
T: FTMS {1,1} + p ESI Full ms [100.00-1000.00]

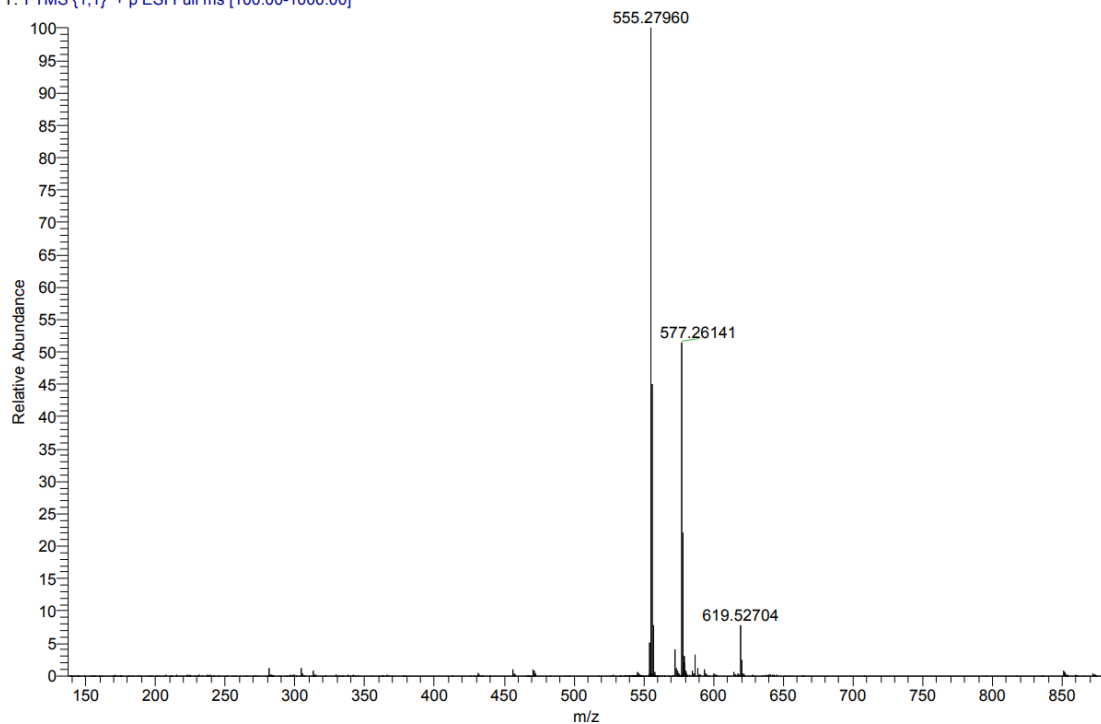

Figure S9: HRMS-ESI spectrum of **5b**

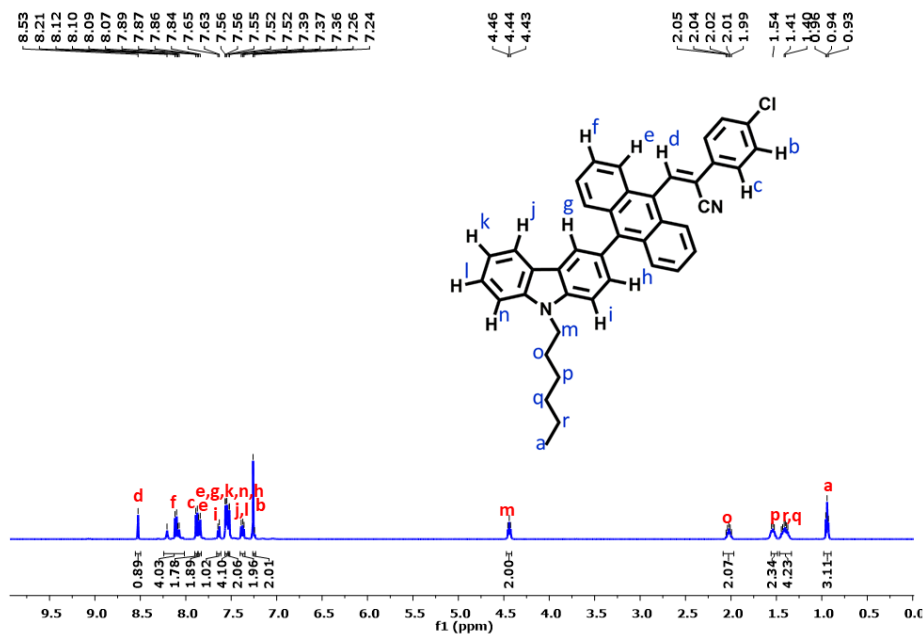

Figure S10:  $^1\text{H}$  NMR spectrum of **5c** ( $\text{CDCl}_3$ , 500 MHz, RT)

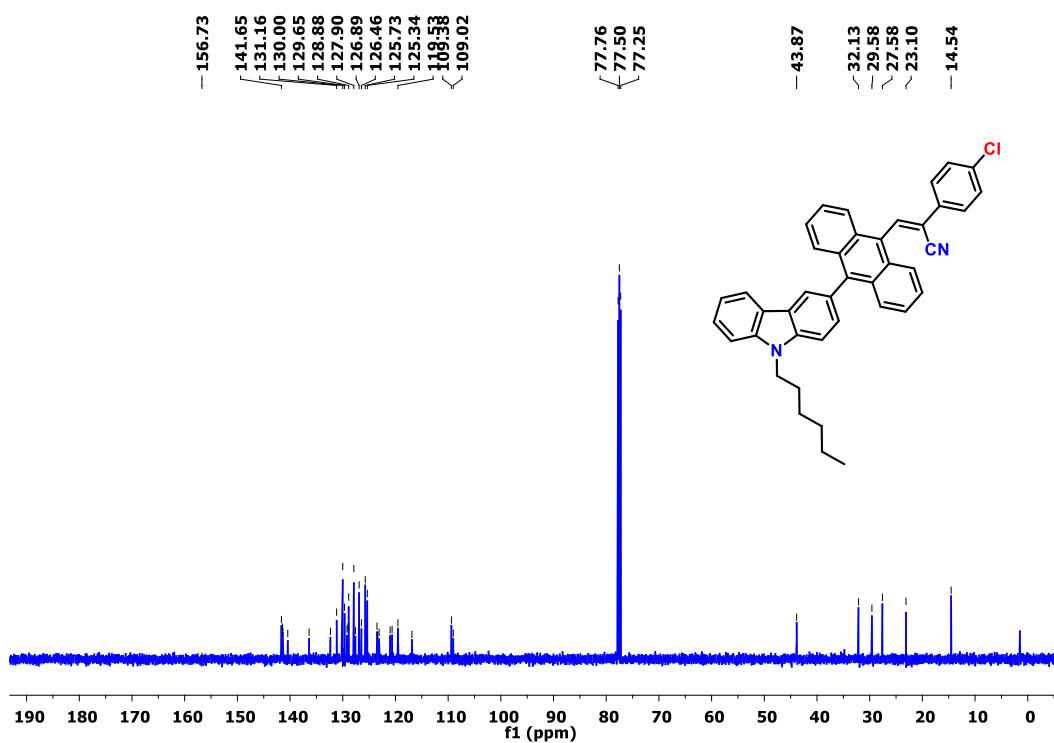

**Figure S11:** <sup>13</sup>C NMR spectrum of **5c** (CDCl<sub>3</sub>, 125 MHz, RT)

AS-AF-3 #152 RT: 2.51 AV: 1 NL: 5.35E6  
 T: FTMS {1,1} + p ESI Full ms [100.00-1000.00]

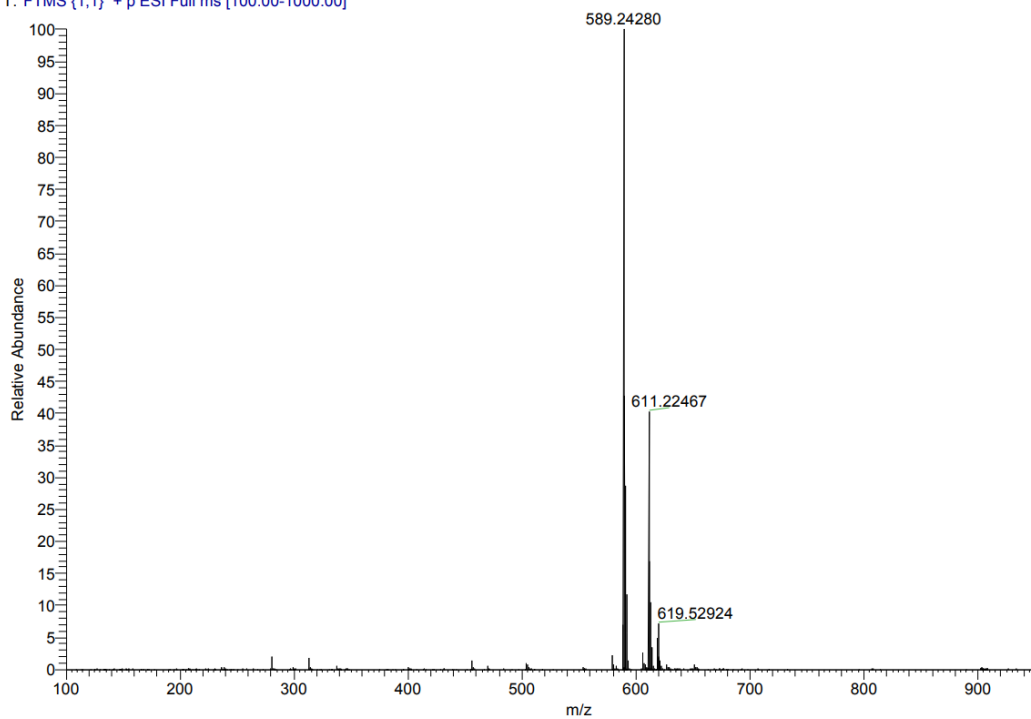

**Figure S12:** HRMS-ESI spectrum of **5c**

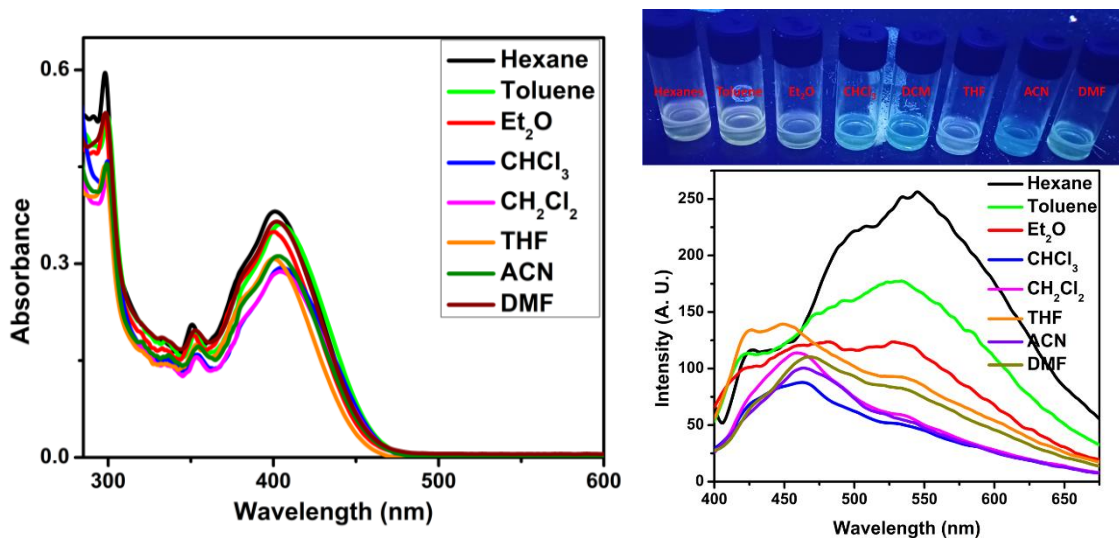

**Figure S13.** Absorption (left) and emission spectra (right) of **5a** in various polarity of solvents (Con  $3 \times 10^{-5}$  M,  $\lambda_{\text{ex}} = 385$  nm).

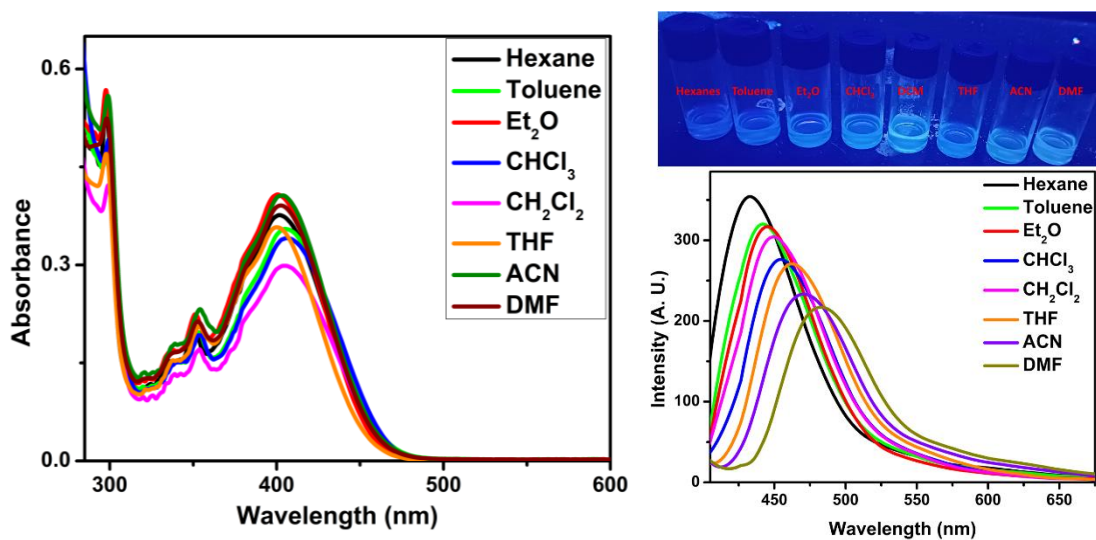

**Figure S14.** Absorption (left) and emission spectra (right) of **5b** in various polarity of solvents (Con  $3 \times 10^{-5}$  M,  $\lambda_{\text{ex}} = 385$  nm).

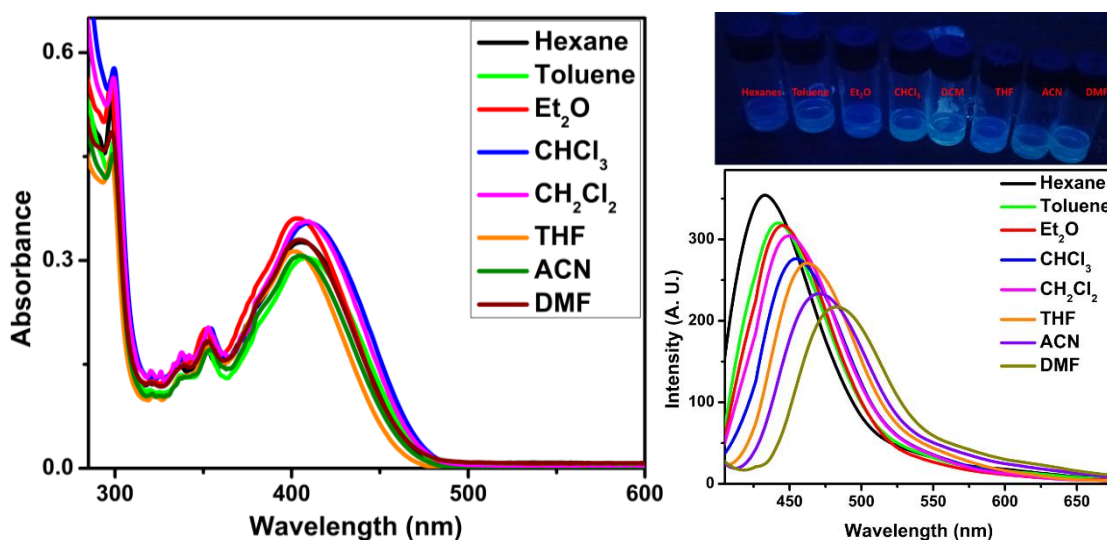

**Figure S15.** Absorption (left) and emission spectra (right) of **5c** in various polarity of solvents (Con  $3 \times 10^{-5}$  M,  $\lambda_{\text{ex}} = 385$  nm).

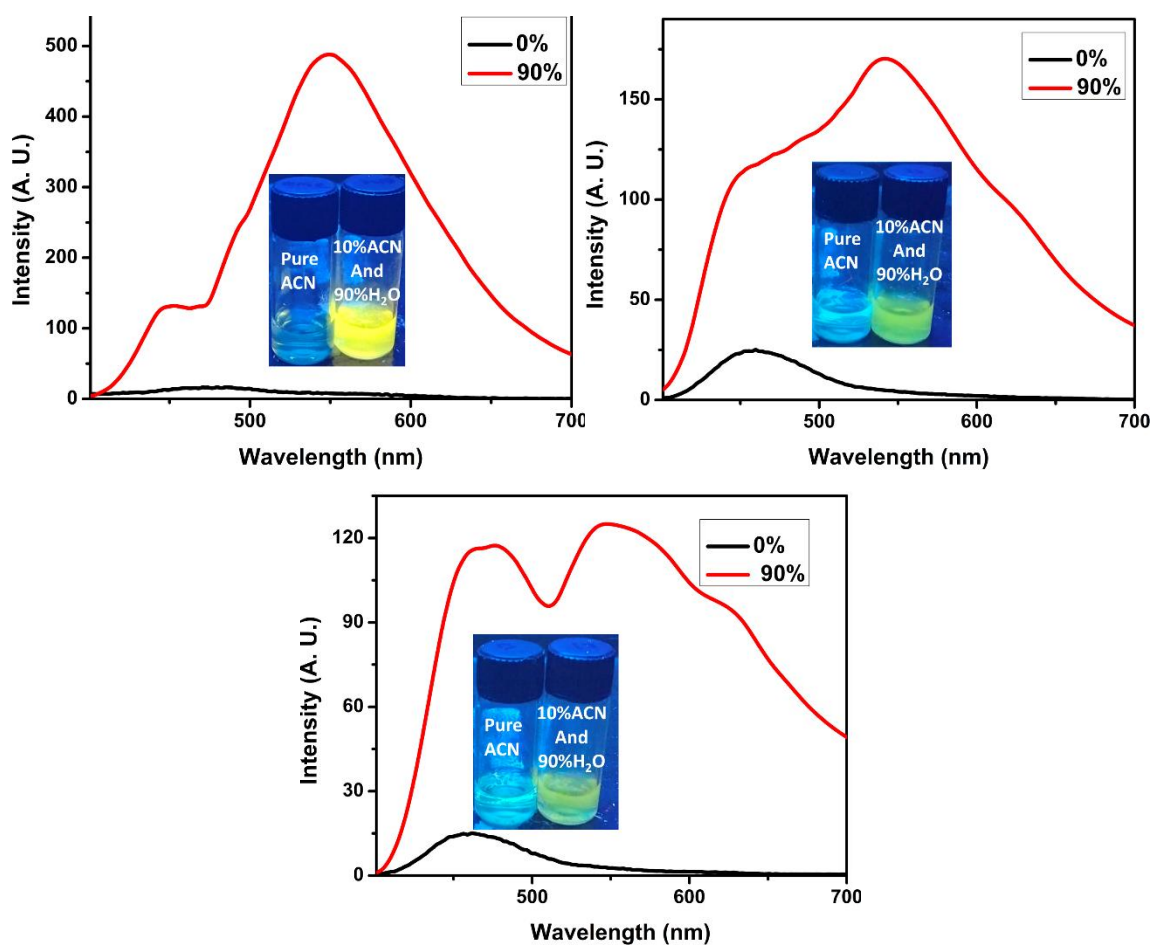

**Figure S16:** Aggregation studies (ACN:H<sub>2</sub>O) of molecule **5a** (top left), **5b** (top right) and **5c** (bottom) (Con  $3 \times 10^{-5}$  M,  $\lambda_{\text{ex}} = 385$  nm).

**Table S1:** Optical data of compound **5a** with different polarity of solvents

| Solvent                         | $\lambda_{\text{abs}}$ | $\lambda_{\text{em}}$ | Stokes shift ( $\text{cm}^{-1}$ ) | Quantum yields (%) <sup>a</sup> |
|---------------------------------|------------------------|-----------------------|-----------------------------------|---------------------------------|
| Hexane                          | 401                    | 545                   | 6589.03                           | 32                              |
| Toluene                         | 404                    | 528                   | 5813.08                           | 27                              |
| Et <sub>2</sub> O               | 400                    | 528                   | 6060.60                           | 15                              |
| CHCl <sub>3</sub>               | 405                    | 463                   | 3093.08                           | 3.2                             |
| CH <sub>2</sub> Cl <sub>2</sub> | 405                    | 458                   | 2857.29                           | 2.1                             |
| THF                             | 400                    | 448                   | 2678.57                           | 0.32                            |
| ACN                             | 403                    | 441                   | 2138.15                           | 0.21                            |
| DMF                             | 402                    | 447                   | 2504.25                           | 0.24                            |

**Table S2:** Optical data of compound **5b** with different polarity of solvents

| Solvent                         | $\lambda_{\text{abs}}$ | $\lambda_{\text{em}}$ | Stokes shift ( $\text{cm}^{-1}$ ) | Quantum yields (%) <sup>a</sup> |
|---------------------------------|------------------------|-----------------------|-----------------------------------|---------------------------------|
| Hexane                          | 402                    | 433                   | 1780.93                           | 15                              |
| Toluene                         | 406                    | 440                   | 1903.26                           | 12                              |
| Et <sub>2</sub> O               | 400                    | 449                   | 2728.28                           | 09                              |
| CHCl <sub>3</sub>               | 406                    | 447                   | 2259.17                           | 07                              |
| CH <sub>2</sub> Cl <sub>2</sub> | 405                    | 448                   | 2369.92                           | 4.2                             |
| THF                             | 400                    | 457                   | 3118.16                           | 3.6                             |
| ACN                             | 403                    | 458                   | 2979.83                           | 3.1                             |
| DMF                             | 402                    | 469                   | 3553.66                           | 2.7                             |

**Table S3:** Optical data of compound **5c** with different polarity of solvents

| Solvent                         | $\lambda_{\text{abs}}$ | $\lambda_{\text{em}}$ | Stokes shift ( $\text{cm}^{-1}$ ) | Quantum yields (%) <sup>a</sup> |
|---------------------------------|------------------------|-----------------------|-----------------------------------|---------------------------------|
| Hexane                          | 405                    | 433                   | 1596.66                           | 18                              |
| Toluene                         | 408                    | 439                   | 1730.76                           | 15                              |
| Et <sub>2</sub> O               | 402                    | 443                   | 2302.25                           | 11                              |
| CHCl <sub>3</sub>               | 408                    | 448                   | 2188.37                           | 08                              |
| CH <sub>2</sub> Cl <sub>2</sub> | 408                    | 453                   | 2434.74                           | 3.5                             |
| THF                             | 401                    | 462                   | 3292.63                           | 3.1                             |
| ACN                             | 405                    | 471                   | 3459.93                           | 2.7                             |
| DMF                             | 405                    | 480                   | 3858.02                           | 2.3                             |

<sup>a</sup>Quantum yields are calculated using quinine sulfate (0.1 M in H<sub>2</sub>SO<sub>4</sub>,  $\Phi_{\text{F}} = 57.7\%$ ) solution as reference and using the following formula  $\phi = \phi_{\text{F}} \times I/\text{I}_{\text{R}} \times A_{\text{R}}/A \times \eta^2/\eta_{\text{R}}^2$  where  $\phi$  = quantum yield, I = integral area of emission peak, A = absorbance at  $\lambda_{\text{ex}}$ ,  $\eta$  = refractive index of solvent.

**Table S4:** Summarizing the optical properties of compound **5a-c** in Dichloromethane.

| Compounds | $\lambda_{\text{abs}}$ (nm)/ $\epsilon$                                         | Emission (nm) | quantum yield <sup>a</sup> (%) in solution state | quantum yield (%) in solid state |
|-----------|---------------------------------------------------------------------------------|---------------|--------------------------------------------------|----------------------------------|
| <b>5a</b> | 404 ( $2.8 \times 10^5$ ), 350 ( $1.5 \times 10^5$ ), 298 ( $4.2 \times 10^5$ ) | 473           | 2.1                                              | 28                               |
| <b>5b</b> | 406 ( $2.9 \times 10^5$ ), 353 ( $1.7 \times 10^5$ ), 297 ( $4.2 \times 10^5$ ) | 458           | 4.2                                              | 22                               |
| <b>5c</b> | 410 ( $3.5 \times 10^5$ ), 352 ( $2.0 \times 10^5$ ), 300 ( $5.6 \times 10^5$ ) | 450           | 3.5                                              | 18                               |

Quantum yields are calculated using quinine sulfate (0.1 M in H<sub>2</sub>SO<sub>4</sub>,  $\Phi_{\text{F}} = 57.7\%$ ) solution as reference and using the following formula  $\phi = \phi_{\text{F}} \times I/\text{I}_{\text{R}} \times A_{\text{R}}/A \times \eta^2/\eta_{\text{R}}^2$  where  $\phi$  = quantum yield, I = integral area of emission peak, A = absorbance at  $\lambda_{\text{ex}}$ ,  $\eta$  = refractive index of solvent. Solution state quantum yields calculated in dichloromethane.

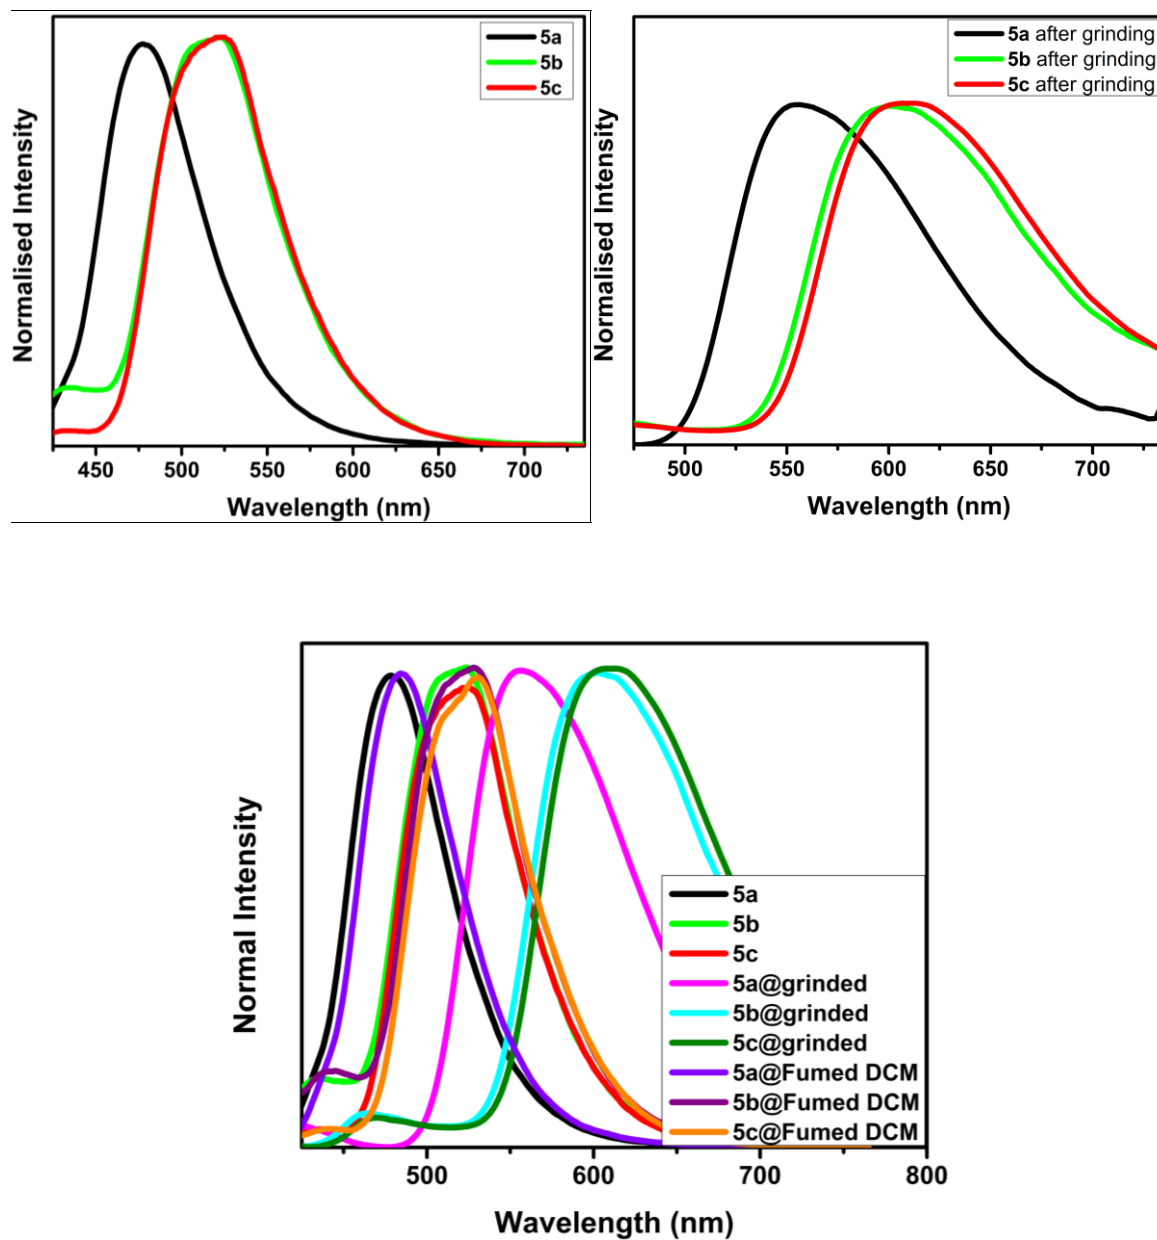

**Figure S17:** Solid state emission spectra of **5a-c** with grinding and fuming with DCM solvent



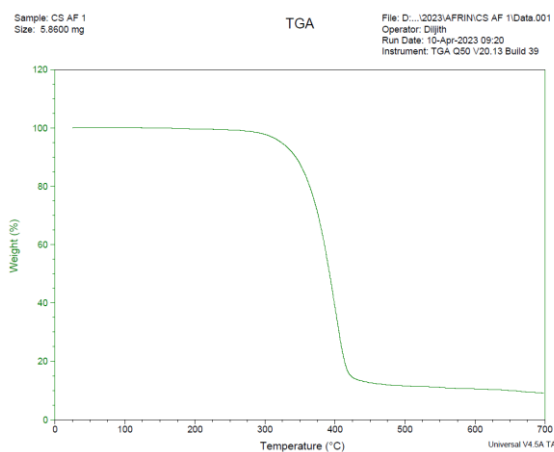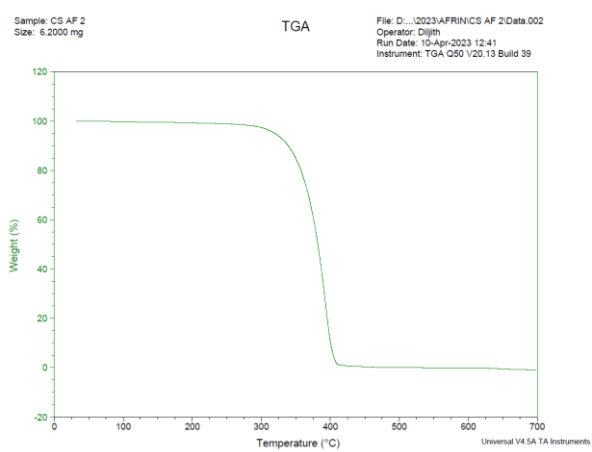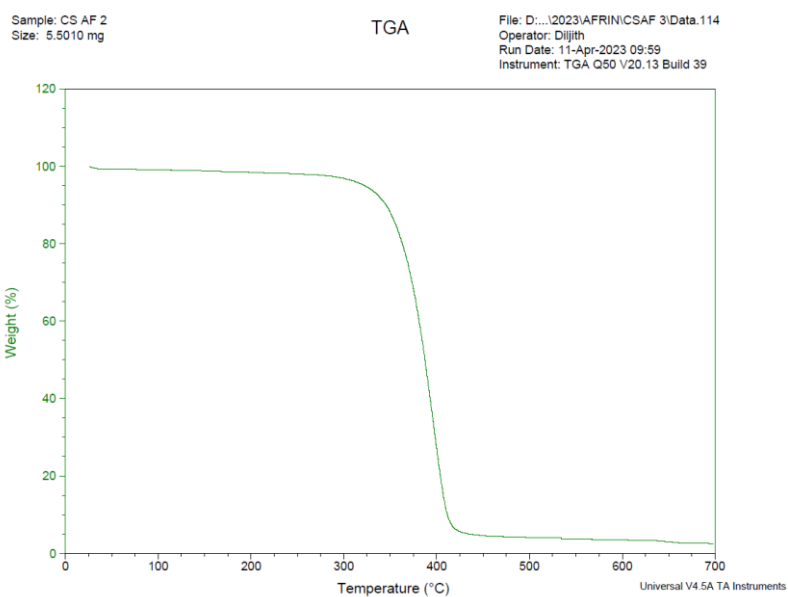

**Figure S18:** TGA data of **5a** (top left), **5b** (top right) and **5c** (bottom).

Sample: CS AF 1  
Size: 5.4403 mg  
Method: mech

DSC

File: D:\...2023\AFRINCSAF1\Data.001  
Operator: DILJITH V  
Run Date: 12-Apr-2023 12:38  
Instrument: DSC Q20 V24.11 Build 124

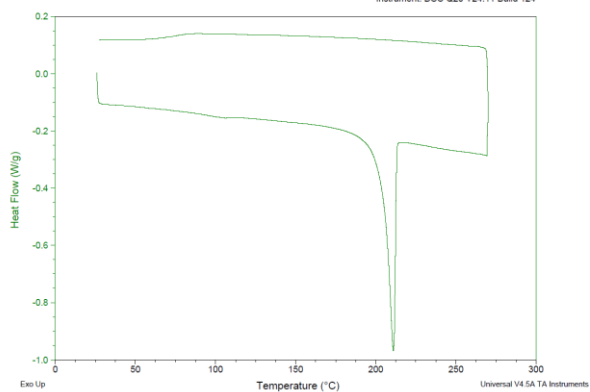

Sample: CS AF 2  
Size: 5.7300 mg  
Method: mech

DSC

File: D:\...2023\AFRINCS AF 2\Data.001  
Operator: DILJITH V  
Run Date: 12-Apr-2023 09:48  
Instrument: DSC Q20 V24.11 Build 124

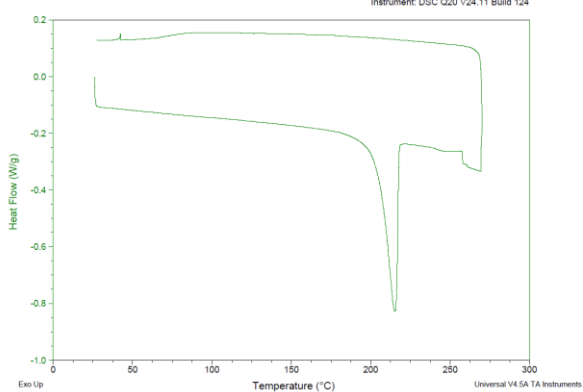

Sample: CS AF 3  
Size: 5.6900 mg  
Method: mech

DSC

File: D:\...2023\AFRINCS AF 3\Data.001  
Operator: DILJITH V  
Run Date: 11-Apr-2023 14:27  
Instrument: DSC Q20 V24.11 Build 124

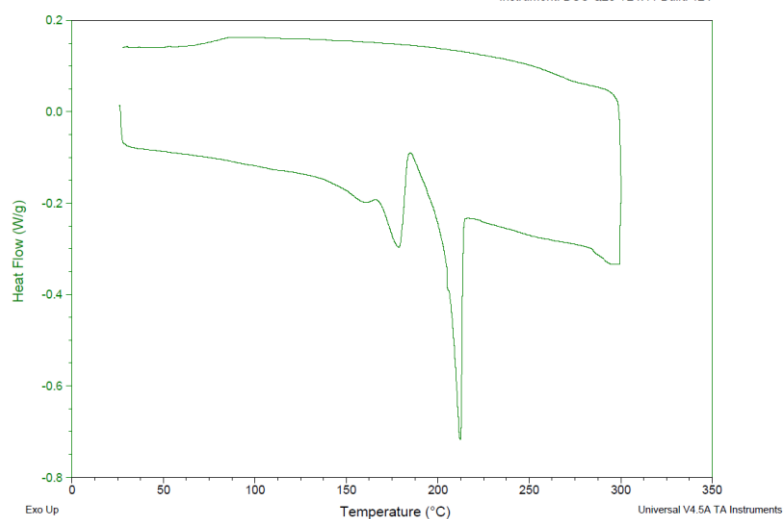

**Figure S19:** DSC data of **5a** (top left), **5b** (top right) and **5c** (bottom).

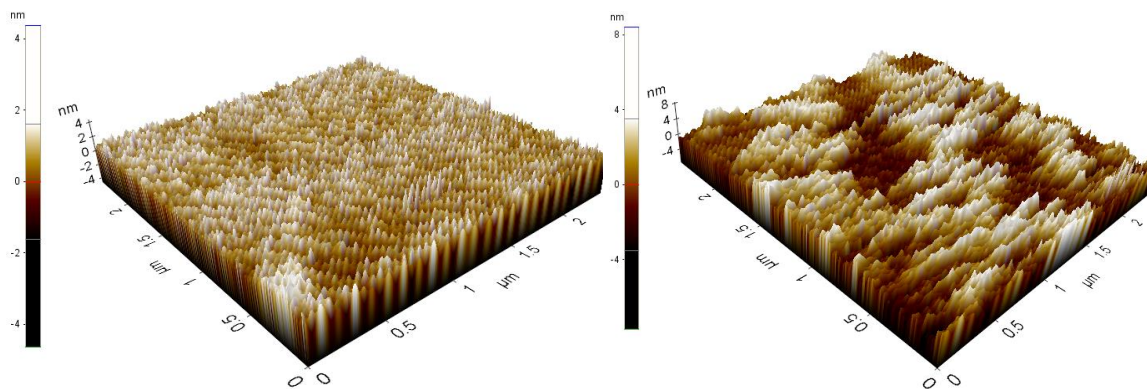

**Figure S20:** AFM images of **5a** ACN (left) and aggregates (right)

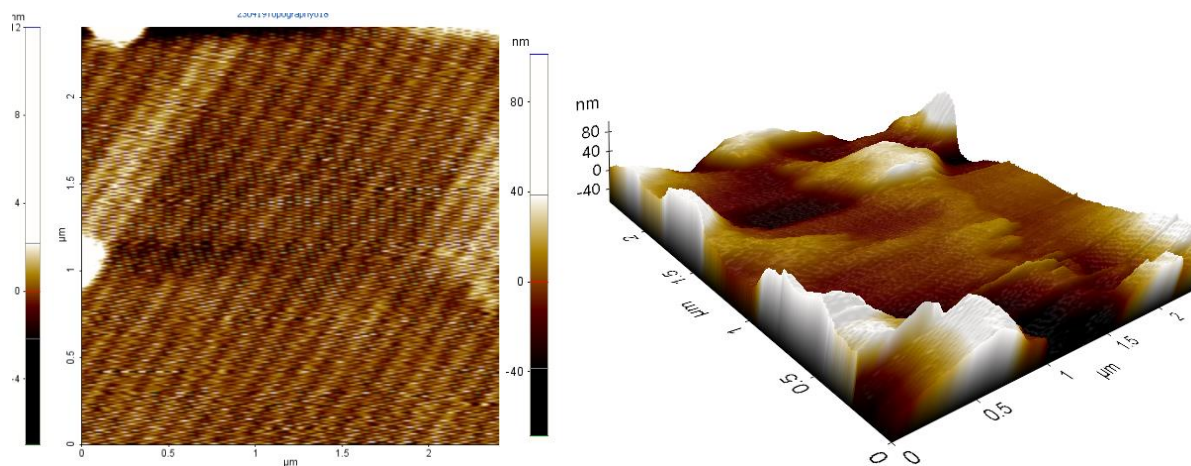

**Figure S21:** AFM images of **5b** ACN (left) and aggregates (right)

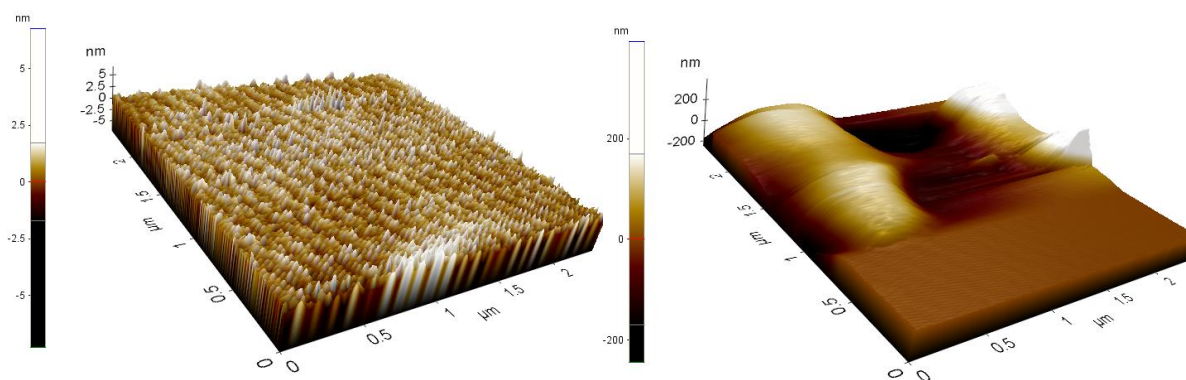

**Figure S22:** AFM images of **5c** ACN (left) and aggregates (right)

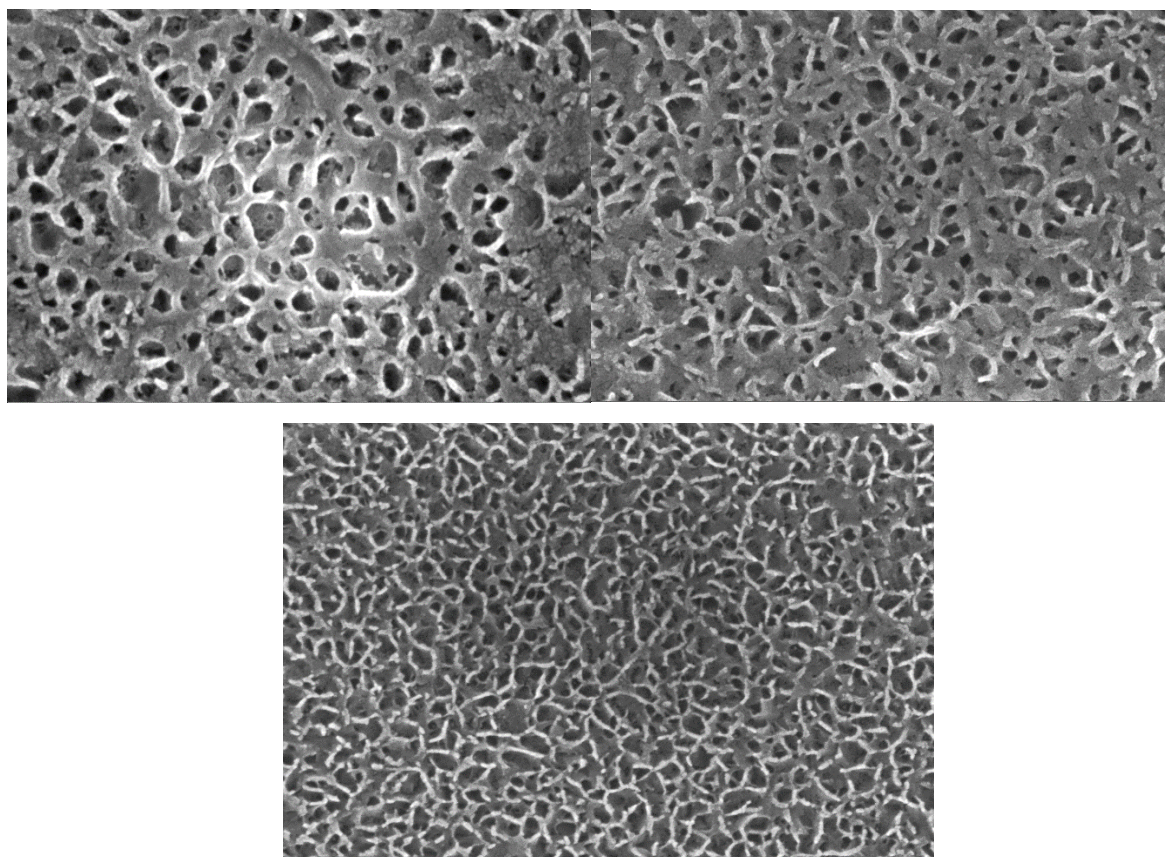

**Figure S23:** FE-SEM images of **5a** (top left), **5b** (top right) and **5c** (bottom).

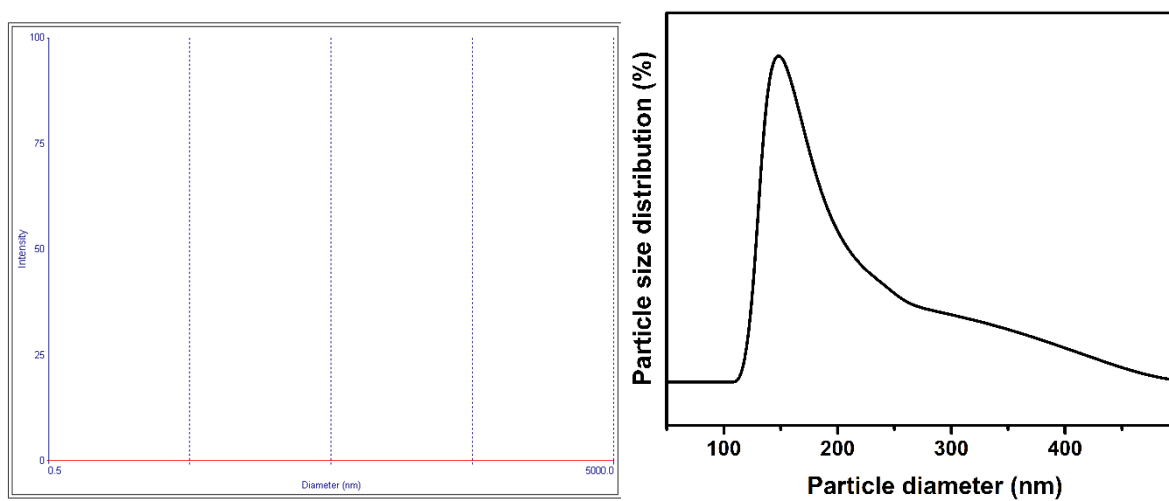

**Figure S24:** DLS plots of **5a** ACN (left) and aggregates (right)

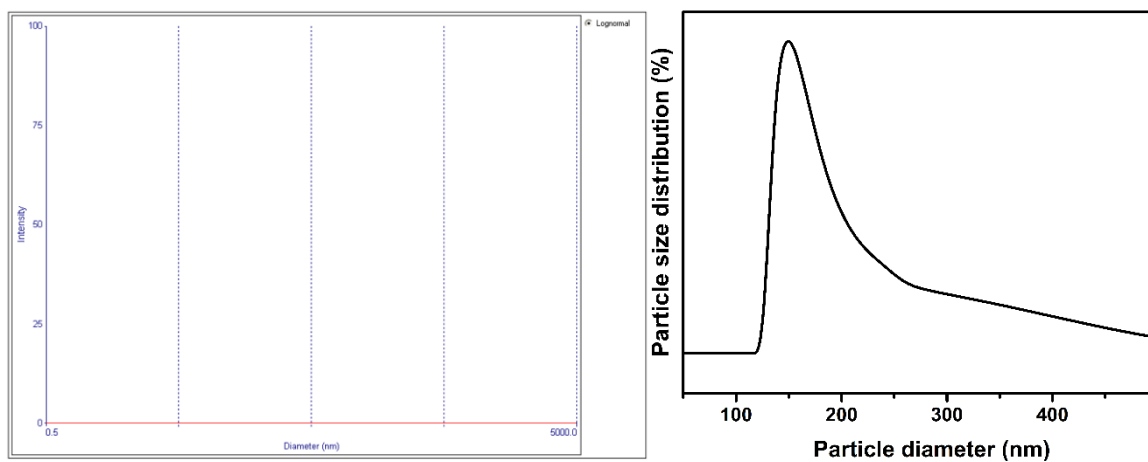

**Figure S25:** DLS plots of **5b** ACN (left) and aggregates (right)

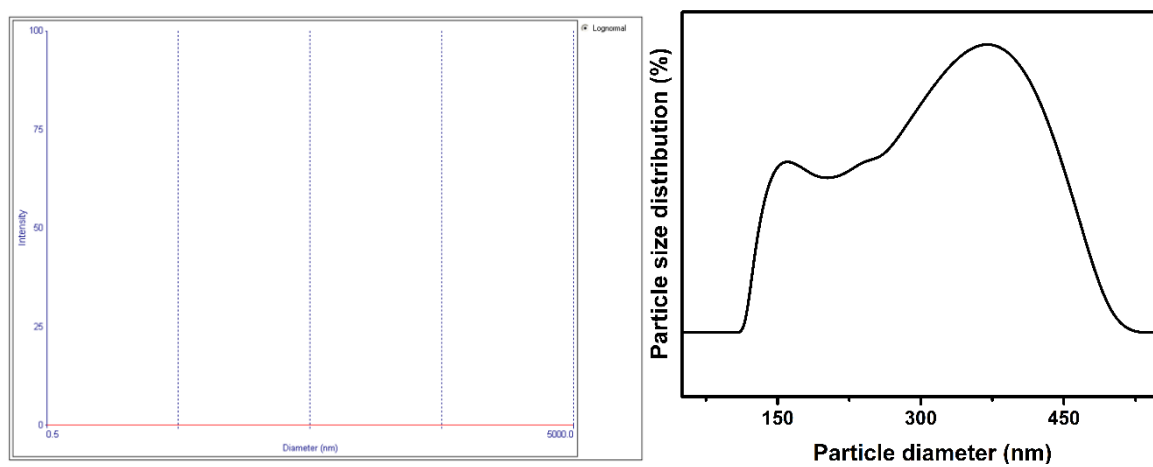

**Figure S24:** DLS plots of **5c** ACN (left) and aggregates (right)

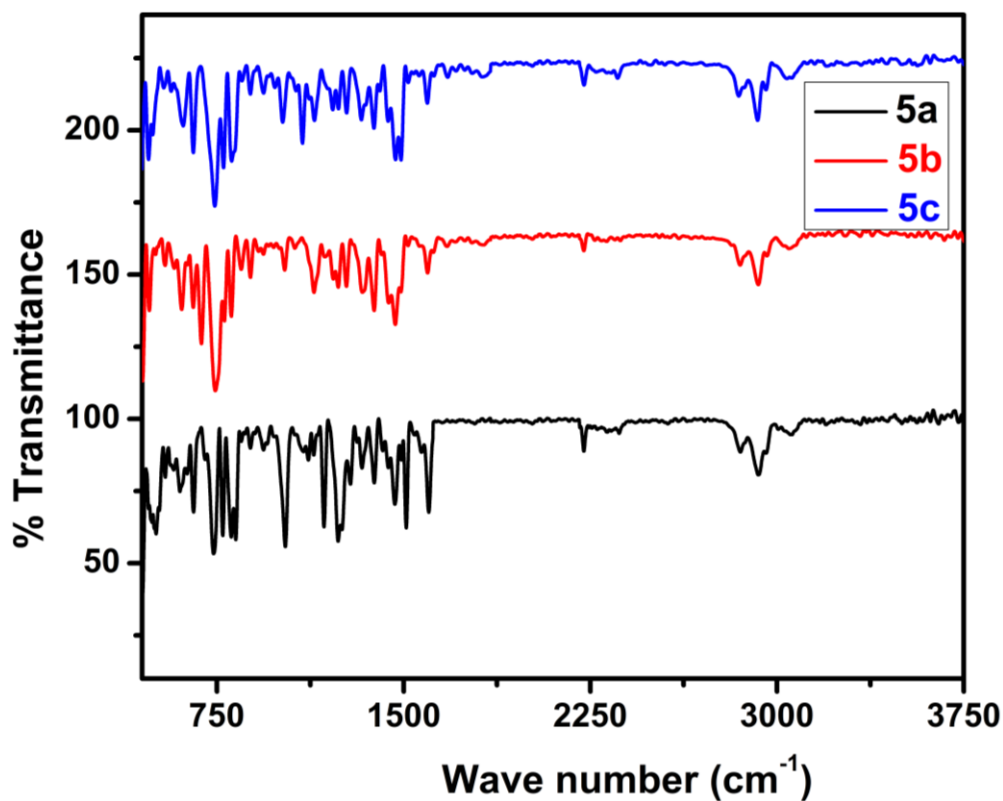

Figure S25: FTIR of **5a**, **5b** and **5c**.

Table S5: DFT data of molecule **5a**

|   |             |              |              |
|---|-------------|--------------|--------------|
| 6 | 2.166112915 | 0.053120662  | 0.331185415  |
| 6 | 2.720090887 | -0.630629735 | 1.435770152  |
| 6 | 4.095825218 | -0.745522435 | 1.619281980  |
| 6 | 4.936218545 | -0.154385605 | 0.671174492  |
| 6 | 4.405657836 | 0.536031904  | -0.451165116 |
| 6 | 3.019874048 | 0.635188703  | -0.611155251 |
| 1 | 2.048922496 | -1.083775221 | 2.159974438  |
| 1 | 4.490565157 | -1.284424490 | 2.475485112  |
| 1 | 2.600814970 | 1.161173817  | -1.465077549 |
| 6 | 6.703053446 | 0.582516019  | -0.525911791 |
| 6 | 7.984595222 | 0.870950609  | -1.005830100 |
| 6 | 8.086380085 | 1.600640880  | -2.188524482 |
| 6 | 6.943810944 | 2.032753306  | -2.883996856 |
| 6 | 5.669835979 | 1.739910162  | -2.405064722 |
| 6 | 5.538496726 | 1.008742215  | -1.219093336 |
| 1 | 8.876367845 | 0.538265964  | -0.482990568 |

|   |              |              |              |
|---|--------------|--------------|--------------|
| 1 | 9.071850789  | 1.836900191  | -2.580945608 |
| 1 | 7.058409251  | 2.598457882  | -3.804164129 |
| 1 | 4.787799456  | 2.073579944  | -2.945612694 |
| 7 | 6.324520207  | -0.107368028 | 0.622245858  |
| 6 | 7.229090981  | -0.747604753 | 1.562528027  |
| 1 | 8.131129324  | -0.129064941 | 1.638933374  |
| 1 | 6.757378148  | -0.727871558 | 2.551774632  |
| 6 | 7.603320210  | -2.187951838 | 1.180416343  |
| 1 | 6.685376016  | -2.783392382 | 1.099046461  |
| 1 | 8.059620279  | -2.182675660 | 0.182661790  |
| 6 | 8.557885904  | -2.825280095 | 2.194312654  |
| 1 | 8.110382454  | -2.864550550 | 3.195096922  |
| 1 | 8.812328931  | -3.850144282 | 1.904649955  |
| 1 | 9.494698866  | -2.259761027 | 2.272023265  |
| 6 | 0.678436746  | 0.146268277  | 0.176433603  |
| 6 | -0.031520601 | 1.194036143  | 0.804787953  |
| 6 | -0.014297212 | -0.810177618 | -0.597608255 |
| 6 | -1.467867239 | 1.267092099  | 0.682191020  |
| 6 | 0.638532564  | 2.195951844  | 1.578240363  |
| 6 | -1.451978931 | -0.728074736 | -0.746607153 |
| 6 | 0.681090395  | -1.872737302 | -1.262180535 |
| 6 | -2.150786312 | 2.318898934  | 1.371538358  |
| 6 | -2.167606730 | 0.298496203  | -0.080947847 |
| 6 | -0.053742696 | 3.201587366  | 2.199439890  |
| 1 | 1.718011119  | 2.143880655  | 1.664357128  |
| 6 | -2.090667501 | -1.675825775 | -1.609202778 |
| 6 | 0.021605799  | -2.774600424 | -2.052269611 |
| 1 | 1.754871256  | -1.944523488 | -1.132425295 |
| 6 | -1.469687916 | 3.260527059  | 2.098319208  |
| 1 | -3.234327663 | 2.357507769  | 1.330717514  |
| 1 | 0.477600123  | 3.951590535  | 2.778985642  |
| 1 | -3.158821160 | -1.597812428 | -1.771837970 |

|   |               |              |              |
|---|---------------|--------------|--------------|
| 6 | -1.383098219  | -2.664163847 | -2.239194754 |
| 1 | 0.571423379   | -3.570394592 | -2.547347768 |
| 1 | -2.014613797  | 4.050439850  | 2.608330610  |
| 1 | -1.897916556  | -3.367750271 | -2.887716528 |
| 6 | -3.630971935  | 0.443099863  | -0.208724100 |
| 1 | -3.980374242  | 1.402584896  | -0.587598274 |
| 6 | -4.593712487  | -0.447566163 | 0.144739405  |
| 6 | -6.046346703  | -0.219516641 | -0.059822398 |
| 6 | -6.996336072  | -0.846149590 | 0.758709913  |
| 6 | -6.518690474  | 0.638030650  | -1.073089730 |
| 6 | -8.362783756  | -0.613558033 | 0.604011564  |
| 1 | -6.665574997  | -1.525829119 | 1.538503226  |
| 6 | -7.873249979  | 0.879652066  | -1.236544369 |
| 1 | -5.816756327  | 1.102313612  | -1.759421562 |
| 6 | -8.810292974  | 0.259044563  | -0.394684818 |
| 1 | -9.061470607  | -1.114920911 | 1.263682086  |
| 1 | -8.235850326  | 1.533874042  | -2.023098059 |
| 8 | -10.115812459 | 0.560074009  | -0.638211501 |
| 6 | -11.109866312 | -0.049467900 | 0.172582777  |
| 1 | -10.989382601 | 0.222619165  | 1.229223318  |
| 1 | -12.065958365 | 0.330309755  | -0.191556344 |
| 1 | -11.092687367 | -1.142875524 | 0.076589547  |
| 6 | -4.231665293  | -1.668919150 | 0.814236265  |
| 7 | -3.998203986  | -2.657884979 | 1.381434301  |

**Table S6:** DFT data of **5b**

|   |              |              |             |
|---|--------------|--------------|-------------|
| 6 | -6.722392599 | 1.177987578  | 2.893295331 |
| 6 | -7.820442429 | 0.757499288  | 2.123030849 |
| 6 | -7.647165244 | 0.154114731  | 0.879036310 |
| 6 | -6.339109306 | -0.025449207 | 0.418012002 |
| 6 | -5.219049582 | 0.398248622  | 1.182354465 |
| 6 | -5.421993645 | 1.001430928  | 2.428735181 |
| 1 | -6.892523138 | 1.645822632  | 3.858702983 |



|   |              |              |              |
|---|--------------|--------------|--------------|
| 1 | -8.827755982 | 0.907183269  | 2.502278774  |
| 1 | -8.505752843 | -0.159947367 | 0.292987239  |
| 1 | -4.574476364 | 1.328408042  | 3.025654187  |
| 6 | -4.503240920 | -0.543529356 | -0.789857010 |
| 6 | -3.607253539 | -0.982649909 | -1.769253548 |
| 6 | -2.245558841 | -0.813161897 | -1.532607038 |
| 6 | -1.759441025 | -0.214071404 | -0.349397851 |
| 6 | -2.668646285 | 0.225265301  | 0.618337435  |
| 6 | -4.041898882 | 0.066423576  | 0.407283845  |
| 1 | -3.949402567 | -1.439659711 | -2.692997562 |
| 1 | -1.531647608 | -1.147525548 | -2.280062817 |
| 1 | -2.301699345 | 0.687208039  | 1.531234014  |
| 6 | -6.737046046 | -1.106316552 | -1.837350738 |
| 1 | -7.634862508 | -1.537530540 | -1.381869607 |
| 1 | -6.208761519 | -1.934251432 | -2.322144452 |
| 6 | -7.117498347 | -0.036068844 | -2.866375846 |
| 1 | -6.224725368 | 0.383774263  | -3.341145858 |
| 1 | -7.751695901 | -0.468924717 | -3.648428165 |
| 1 | -7.667038072 | 0.783621318  | -2.392240932 |
| 7 | -5.891213682 | -0.606288529 | -0.765060431 |
| 6 | -0.284225860 | -0.054561707 | -0.143687599 |
| 6 | 0.334789820  | 1.191570404  | -0.393726223 |
| 6 | 0.489700923  | -1.150256150 | 0.299290577  |
| 6 | 1.761236740  | 1.334928834  | -0.224369173 |
| 6 | -0.415344661 | 2.327028943  | -0.840007371 |
| 6 | 1.918747079  | -1.010685624 | 0.483335676  |
| 6 | -0.117220065 | -2.412475426 | 0.603848763  |
| 6 | 2.352322907  | 2.602838925  | -0.525578575 |
| 6 | 2.543542286  | 0.229018606  | 0.195129335  |
| 6 | 0.189403187  | 3.529654934  | -1.093877812 |
| 1 | -1.484754053 | 2.216553572  | -0.978298077 |
| 6 | 2.639081512  | -2.131857875 | 1.006469394  |

|   |              |              |              |
|---|--------------|--------------|--------------|
| 6 | 0.618911296  | -3.465323740 | 1.075227553  |
| 1 | -1.186919714 | -2.516401673 | 0.463839353  |
| 6 | 1.594064266  | 3.668964893  | -0.934358272 |
| 1 | 3.428681004  | 2.714267360  | -0.447052856 |
| 1 | -0.402198739 | 4.376590294  | -1.430519809 |
| 1 | 3.700839700  | -2.030513970 | 1.194652465  |
| 6 | 2.016102659  | -3.317940457 | 1.288580384  |
| 1 | 0.134667181  | -4.411227501 | 1.301875798  |
| 1 | 2.070194861  | 4.621199509  | -1.152282714 |
| 1 | 2.592088482  | -4.149573545 | 1.685062813  |
| 6 | 3.990765564  | 0.439590924  | 0.386215569  |
| 1 | 4.265814059  | 1.259557605  | 1.048047607  |
| 6 | 5.020964313  | -0.219449094 | -0.204195353 |
| 6 | 4.762775712  | -1.198261893 | -1.225779724 |
| 7 | 4.609298799  | -1.979223550 | -2.074811398 |
| 6 | 6.451199102  | 0.057867625  | 0.096952047  |
| 6 | 7.442134884  | -0.169191844 | -0.872963144 |
| 6 | 6.842964630  | 0.556451547  | 1.351453367  |
| 6 | 8.778734060  | 0.120523754  | -0.605305947 |
| 1 | 7.160304659  | -0.570036871 | -1.842121504 |
| 6 | 8.179380552  | 0.847926117  | 1.615092912  |
| 1 | 6.102558715  | 0.690708848  | 2.134618767  |
| 6 | 9.153283283  | 0.634474557  | 0.637120195  |
| 1 | 9.528593515  | -0.057099097 | -1.371294349 |
| 1 | 8.462206212  | 1.227567840  | 2.593229960  |
| 1 | 10.196204591 | 0.855459252  | 0.846717820  |

**Table S7:** DFT data of **5c**

|   |              |             |             |
|---|--------------|-------------|-------------|
| 6 | -7.243657802 | 1.528494812 | 2.878036812 |
| 6 | -8.370304846 | 1.073160147 | 2.171469120 |
| 6 | -8.242536746 | 0.362143960 | 0.979982681 |
| 6 | -6.950898162 | 0.110153873 | 0.506627483 |

|   |              |              |              |
|---|--------------|--------------|--------------|
| 6 | -5.802401600 | 0.567741142  | 1.206380975  |
| 6 | -5.959761081 | 1.279192340  | 2.401169290  |
| 1 | -7.378561910 | 2.080829270  | 3.803521327  |
| 1 | -9.363955678 | 1.281032120  | 2.559189125  |
| 1 | -9.122517711 | 0.022235997  | 0.442040854  |
| 1 | -5.090241812 | 1.633557441  | 2.948777571  |
| 6 | -5.158964167 | -0.553768973 | -0.695578892 |
| 6 | -4.298213312 | -1.095483511 | -1.655014599 |
| 6 | -2.927333197 | -0.941212880 | -1.465516105 |
| 6 | -2.397903213 | -0.257657865 | -0.348609352 |
| 6 | -3.272044565 | 0.283587390  | 0.599778765  |
| 6 | -4.653355986 | 0.142268921  | 0.435007918  |
| 1 | -4.674034020 | -1.619127815 | -2.528910921 |
| 1 | -2.240856683 | -1.354259774 | -2.199249407 |
| 1 | -2.871900669 | 0.810451081  | 1.462175673  |
| 6 | -7.431933352 | -1.143342364 | -1.640289941 |
| 1 | -8.320785762 | -1.526802958 | -1.127737938 |
| 1 | -6.929232322 | -2.011924757 | -2.078673577 |
| 6 | -7.830320739 | -0.145067485 | -2.732906126 |
| 1 | -6.947556090 | 0.223908218  | -3.265169452 |
| 1 | -8.496024660 | -0.623300837 | -3.460382055 |
| 1 | -8.352147663 | 0.716143096  | -2.303179083 |
| 7 | -6.546767349 | -0.579064439 | -0.633372223 |
| 6 | -0.915338832 | -0.116737679 | -0.189005401 |
| 6 | -0.277680326 | 1.093993781  | -0.544717936 |
| 6 | -0.154049000 | -1.192076155 | 0.321005175  |
| 6 | 1.153975086  | 1.221392114  | -0.411278507 |
| 6 | -1.015210370 | 2.205952014  | -1.064824521 |
| 6 | 1.280548976  | -1.068350598 | 0.469232811  |
| 6 | -0.779884247 | -2.414347925 | 0.731588356  |
| 6 | 1.762043677  | 2.450913052  | -0.818592748 |
| 6 | 1.923075817  | 0.133839036  | 0.076937886  |

|    |              |              |              |
|----|--------------|--------------|--------------|
| 6  | -0.393718182 | 3.373782347  | -1.420367475 |
| 1  | -2.088547627 | 2.105306020  | -1.177404737 |
| 6  | 1.987731736  | -2.160110775 | 1.066624046  |
| 6  | -0.055997148 | -3.443232807 | 1.270079988  |
| 1  | -1.853846151 | -2.505899680 | 0.618158335  |
| 6  | 1.015650286  | 3.497467310  | -1.294727090 |
| 1  | 2.841458885  | 2.548143513  | -0.768657429 |
| 1  | -0.975656752 | 4.203523012  | -1.811973858 |
| 1  | 3.053982934  | -2.066706138 | 1.231753018  |
| 6  | 1.347044156  | -3.308089150 | 1.449352444  |
| 1  | -0.554173783 | -4.358782088 | 1.576770631  |
| 1  | 1.505101082  | 4.420778997  | -1.592742291 |
| 1  | 1.913831112  | -4.117874008 | 1.900474514  |
| 6  | 3.375848667  | 0.329725138  | 0.224994006  |
| 1  | 3.677425294  | 1.202510980  | 0.802266820  |
| 6  | 4.384279589  | -0.402202093 | -0.316830095 |
| 6  | 4.094878504  | -1.461942338 | -1.244314607 |
| 7  | 3.919310008  | -2.311029888 | -2.020532793 |
| 6  | 5.822827366  | -0.127997657 | -0.061838535 |
| 6  | 6.798363243  | -0.481049621 | -1.009315992 |
| 6  | 6.245489013  | 0.493188617  | 1.125898518  |
| 6  | 8.145365779  | -0.199546567 | -0.796494507 |
| 1  | 6.500175885  | -0.977979279 | -1.927435391 |
| 6  | 7.588398946  | 0.783391216  | 1.349280719  |
| 1  | 5.523474971  | 0.731231104  | 1.900996749  |
| 6  | 8.531563146  | 0.437687123  | 0.381561541  |
| 1  | 8.888502884  | -0.471545709 | -1.538265821 |
| 1  | 7.903926649  | 1.257873149  | 2.272299374  |
| 17 | 10.228876365 | 0.793658355  | 0.660586851  |
